# Supplementary material for: CB[10]-driven self-assembly of a homotrimer from a symmetric organic dye: tunable multicolor fluorescence and higher solid-state stability than that of a CB[8]-included homodimer
Source: Royal Society of Chemistry journal article supplement (doi:10.1039/d2qo01438f), 2022-01-01
Supplement: d2qo01438f1.pdf [file d2qo01438f1.pdf]

## Supporting Information

### **CB[10]-Driven Self-Assembly of Homotrimer from Symmetric Organic Dye: Tunable Multicolor Fluorescence and Higher Solid-State Stability Than CB[8]-Included Homodimer**

Le-Ping Zhang <sup>a</sup>, Chuan-Zhi Liu <sup>b</sup>, Ming Liu <sup>c</sup>, Shuai Lu <sup>d</sup>, Shang-Bo Yu <sup>e</sup>, Qiao-Yan Qi <sup>e</sup>, Guan-Yu

Yang <sup>a</sup>, Xiaopeng Li <sup>d</sup>, Bo Yang <sup>a\*</sup>, Zhan-Ting Li <sup>e,f\*</sup>

<sup>a</sup> College of Chemistry, Zhengzhou University, Zhengzhou 450001, China

<sup>b</sup> School of Chemistry and Chemical Engineering, Henan Engineering Laboratory of Green Synthesis for Pharmaceuticals, Shangqiu Normal University, Shangqiu 476000, China

<sup>c</sup> School of Chemistry and Chemical Engineering, Guizhou University, Key Laboratory of Macrocyclic and Supramolecular Chemistry of Guizhou Province, Department of Chemistry, Guiyang 550025, China

<sup>d</sup> College of Chemistry and Environmental Engineering, Shenzhen University, Shenzhen 518055, China

<sup>e</sup> Key Laboratory of Synthetic and Self-Assembly Chemistry for Organic Functional Molecules, Shanghai Institute of Organic Chemistry, Chinese Academy of Sciences, Shanghai 200032, China

<sup>f</sup> Department of Chemistry, Fudan University, 2205 Songhu Road, Shanghai 200438, China

## Experimental Methods

**Materials and methods.** All reagents were purchased from supplier and used without further purification. Column chromatography was performed on silica gel (200-300 mesh), and thin-layer chromatography (TLC) was performed on pre-coated silica gel plates ( $0.2 \pm 0.03$  mm thick). The molecular structures were confirmed using  $^1\text{H}$  NMR,  $^{13}\text{C}$  NMR and high-resolution ESI mass spectroscopy.  $^1\text{H}$ ,  $^{13}\text{C}$  NMR, 2D NOESY and COSY spectra were recorded on 400 MHz spectrometers. 2D DOSY spectra were measured on 600 MHz spectrometer. The experiments were performed in the indicated solvents at room temperature (298 K). UV-Vis absorption spectra were performed on a UV-2600i (1 cm quartz cell was used). Fluorescence spectra were recorded on a RF-6000 (Excitation slit = 5 nm, Emission slit = 5 nm). Lifetime were recorded on a FLS980 (Excitation slit = 5 nm; Emission slit = 5 nm; Delay time = 0.0 ms; Gate time = 4 ms). Confocal luminescence imaging was carried out on a Leica SP8 confocal microscope.

**Density functional theory (DFT).** DFT calculations were using DMol3 code in Materials Studio software 7.0 (Accelrys Inc.). The exchange-correlation energy was calculated within the generalized gradient approximation (GGA) using PBE functional. As the PBE energy functional cannot describe the van der Waals dispersion interactions, a Grimme custom method for DFT-D correction was employed for the calculation of molecular adsorption. The valence electron functions were expanded into a set of numerical atomic orbitals by a double numerical basis with polarization functions (DNP), All-electron core treatment. The convergence criteria of energy, displacement and gradient were  $1 \times 10^{-5}$  Ha,  $5 \times 10^{-3}$  Å and  $2 \times 10^{-3}$  Ha/Å. The effect of the bulk solvent was investigated using the conductor-like screening model (COSMO) as implemented in Dmol3. This is a dielectric continuum solvation model in which the mutual polarization of the solute and solvent is represented by screening charges on the surface of the solute cavity. These charges are derived under the simplified boundary condition that the electrostatic potential vanishes for a conductor ( $\epsilon = 0$ ), and the charges are scaled to account for the finite dielectric permittivity of a real solvent. In this case, bulk water solvent is represented by a dielectric permittivity  $\epsilon = 78.54$ .

**Cell imaging.** B16 cells were cultured in RPMI-1640 medium containing 10% FBS and 1% penicillin/streptomycin at 37°C, in 5% CO<sub>2</sub>. The B16 cells were incubated with the **G1** (20 μM), **G1**⊂(CB[7])<sub>2</sub> ([**G1**] = 20 μM), (**G1**)<sub>2</sub>⊂(CB[8])<sub>2</sub> ([**G1**] = 20 μM), and (**G1**)<sub>2</sub>⊂(CB[10])<sub>3</sub> ([**G1**] = 20 μM) for 24 h at 37 °C. Then the cells were washed with PBS (phosphate buffer saline) for three times, cells were fixed with 4% paraformaldehyde for 20min and transferred into Cell Imaging System (Leica SP8) for confocal luminescence imaging.

## Synthesis Procedures

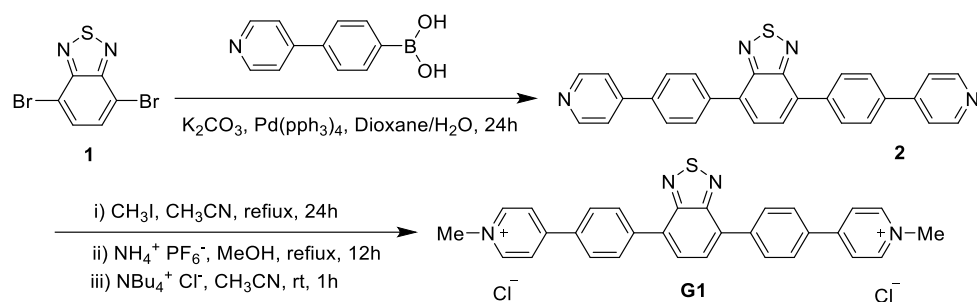

**Synthesis of compound 2.** A mixture of compound 1 (100 mg, 0.34 mmol),  $K_2CO_3$  (242 mg, 1.75 mmol),  $Pd(PPh_3)_4$  (40 mg), and 4-(4-Pyridyl)phenylboronic Acid (203 mg, 1.02 mmol) in the mixed solution of 1,4-dioxane/water (12 mL, 2:1), was heated to 100 °C under nitrogen for 24h. After falling to room temperature, 1,4-dioxane and water were removed by rotary evaporation. The solid is dissolved in dichloromethane. It was purified by column (dichloromethane/methanol = 100:1) to obtain yellow solid compound 2 (yield 40%). M.p. > 285 °C (decomp).  $^1H$  NMR (400 MHz,  $CDCl_3$ )  $\delta$  8.72 (d, 4H), 8.14 (d, 4H), 7.90 (s, 2H), 7.86 (d, 4H), 7.63 (d, 4H).  $^{13}C$  NMR (100 MHz,  $CDCl_3$ )  $\delta$  154.02, 150.28, 147.85, 138.10, 138.07, 132.85, 130.00, 128.20, 127.33, 121.61.  $[M+H]^+$  calcd for  $C_{18}H_{18}N_4S$ , 443.1317; found, 443.1340

**synthesis of compound G1.** A mixture of Compound 2 (330mg) and Methyl iodide (2ml) in  $CH_3CN$  (8ml) was stirred at 100 °C for 24 hours. After falling to room temperature, acetonitrile was removed by rotary evaporation to obtain a yellowish solid. To the mixture was added  $MeOH$  (20ml) and a saturated aqueous solution of ammonium hexafluorophosphate was stirred at 80 °C for 12 hours. The precipitate was filtrated and then dissolved in  $CH_3CN$ . To the solution was added dropwise saturated aqueous solution of tetrabutylammonium chloride. The precipitate was filtrated, washed with  $CH_3CN$ , and dried under vacuum to afford a yellowish solid compound G1 (yield 65%). M.p. > 278 °C (decomp).  $^1H$  NMR (400 MHz,  $CDCl_3$ )  $\delta$  8.50 (d, 4H), 8.03 (d, 4H), 7.69 (d, 4H), 7.52 (m, 6H), 4.02 (s, 6H).  $^{13}C$  NMR (100 MHz,  $CDCl_3$ )  $\delta$  154.04, 153.69, 146.17, 140.53, 133.79, 132.12, 130.76, 129.47, 128.84, 124.55.  $[M+H]^+$  calcd for  $[C_{30}H_{24}N_4S]^{2+}$ , 236.0855. Found, 236.0878.

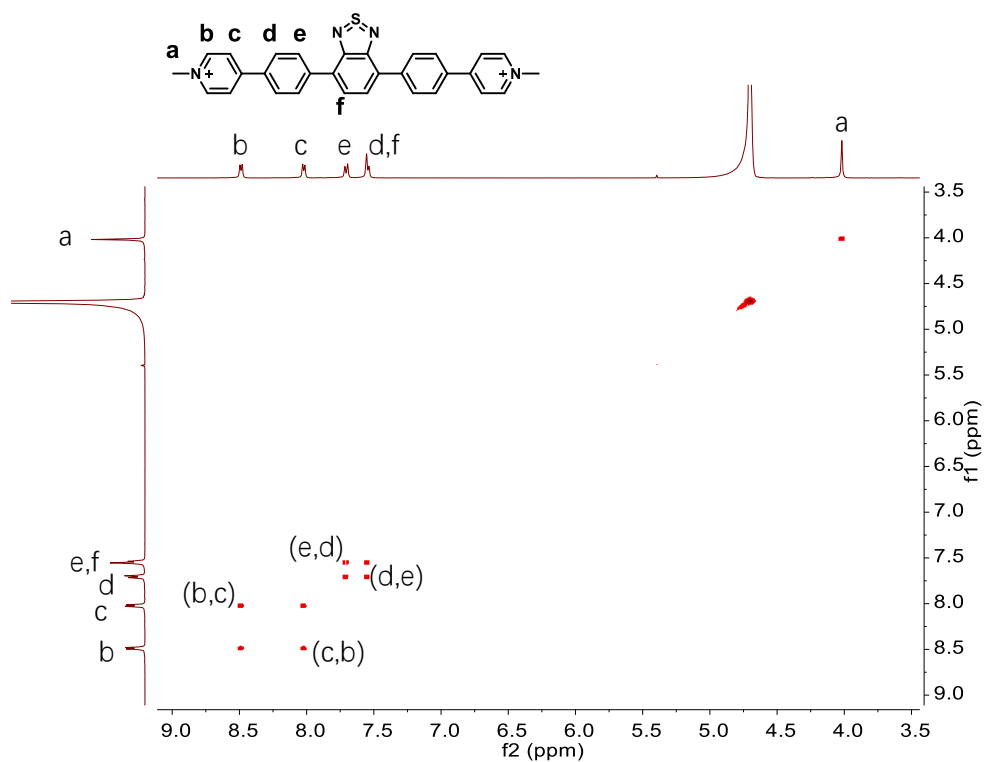

**Figure S1.** 2D  $^1\text{H}$ - $^1\text{H}$  COSY NMR spectrum (400 MHz,  $\text{D}_2\text{O}$ , 298 K) of G1.

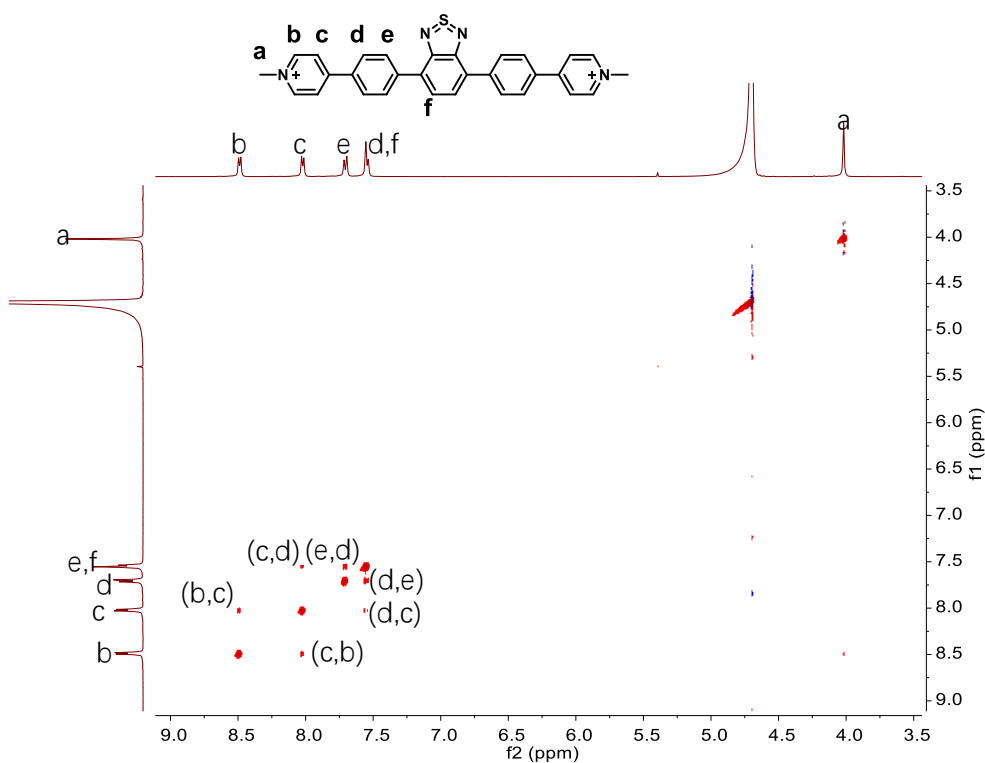

**Figure S2.** 2D  $^1\text{H}$ - $^1\text{H}$  NOESY NMR spectrum (400 MHz,  $\text{D}_2\text{O}$ , 298 K) of G1.

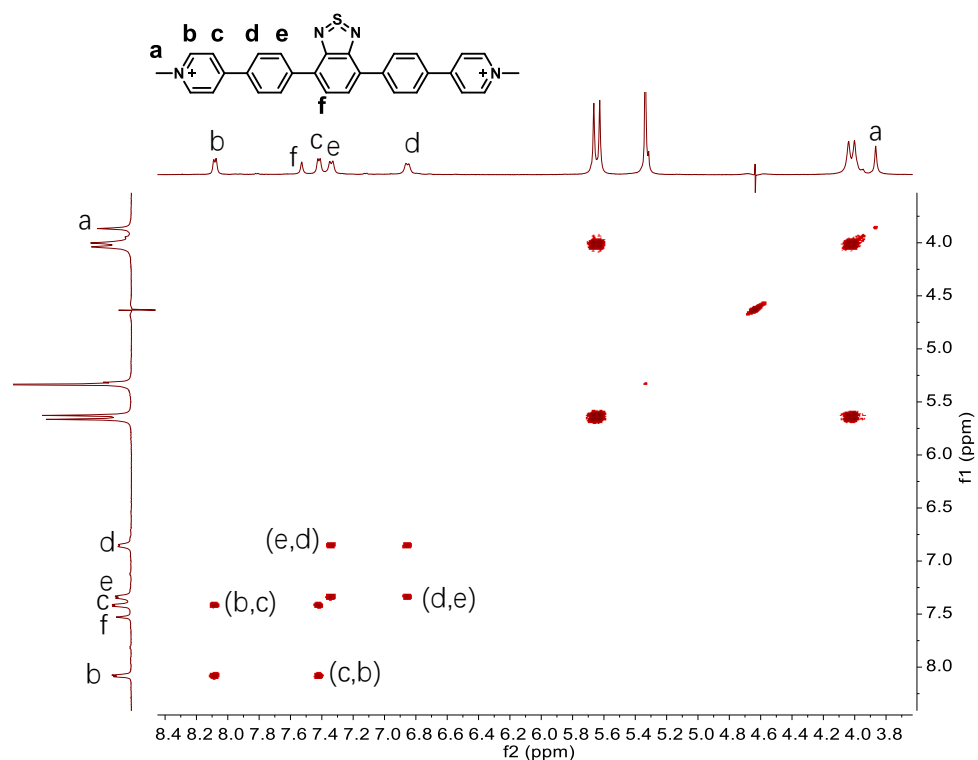

**Figure S3.** 2D  $^1\text{H}$ - $^1\text{H}$  COSY NMR spectrum (400 MHz,  $\text{D}_2\text{O}$ , 298 K) of  $(\text{G1})_3\text{C}(\text{CB}[10])_2$ .

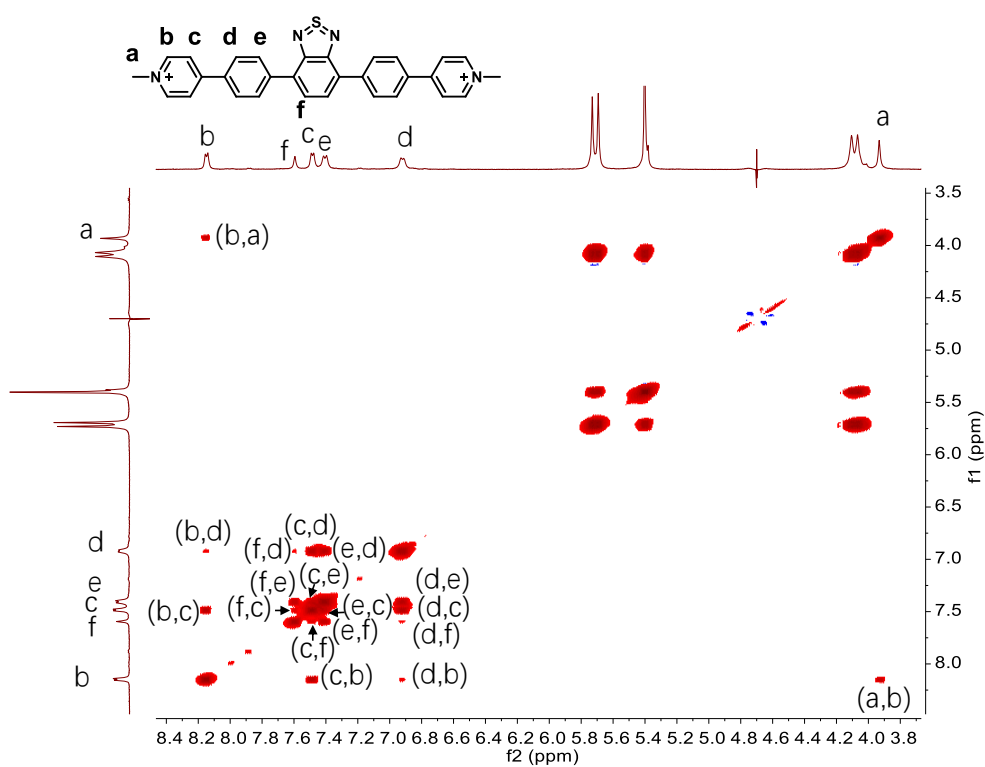

**Figure S4.** Annotated 2D  $^1\text{H}$ - $^1\text{H}$  NOESY NMR spectrum (400 MHz,  $\text{D}_2\text{O}$ , 298 K) of  $(\text{G1})_3\text{C}(\text{CB}[10])_2$ .

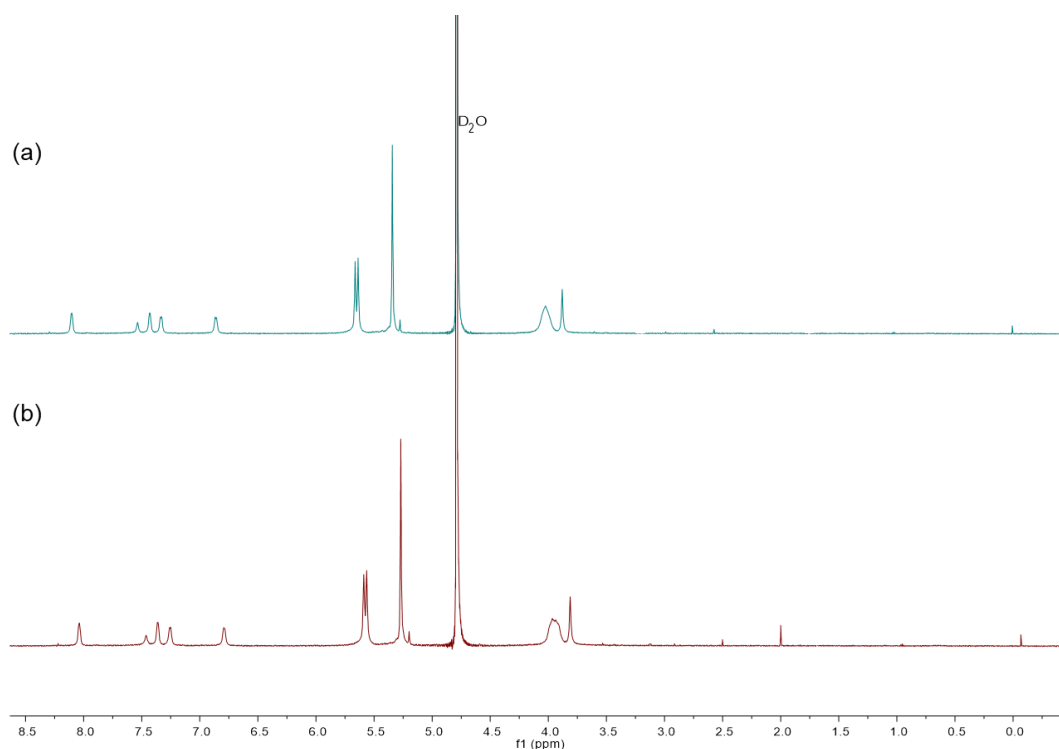

**Figure S5.** <sup>1</sup>H NMR spectra (600 MHz) of the mixture of **G1** (1.0 mM) and CB[10] (0.67 mM) in D<sub>2</sub>O at 10 °C (a) and 4 °C (b).

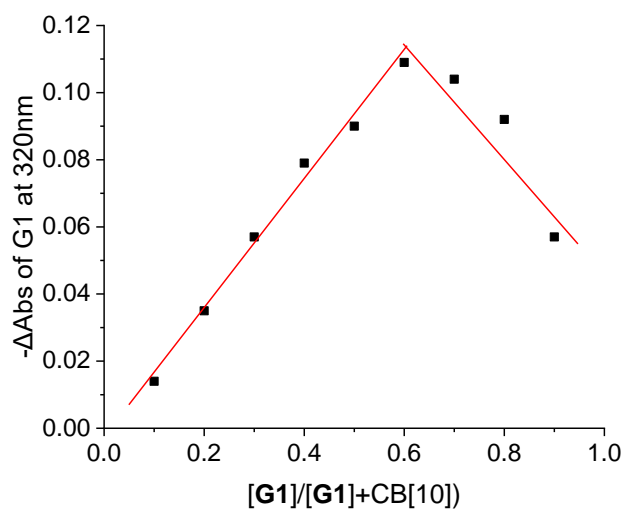

**Figure S6.** Job's plot obtained from UV-vis absorption spectroscopy (25 °C), which support the 3:2 stoichiometry of the complex formed by **G1** and CB[10]. [G1] + [CB[10]] = 0.01 mM.

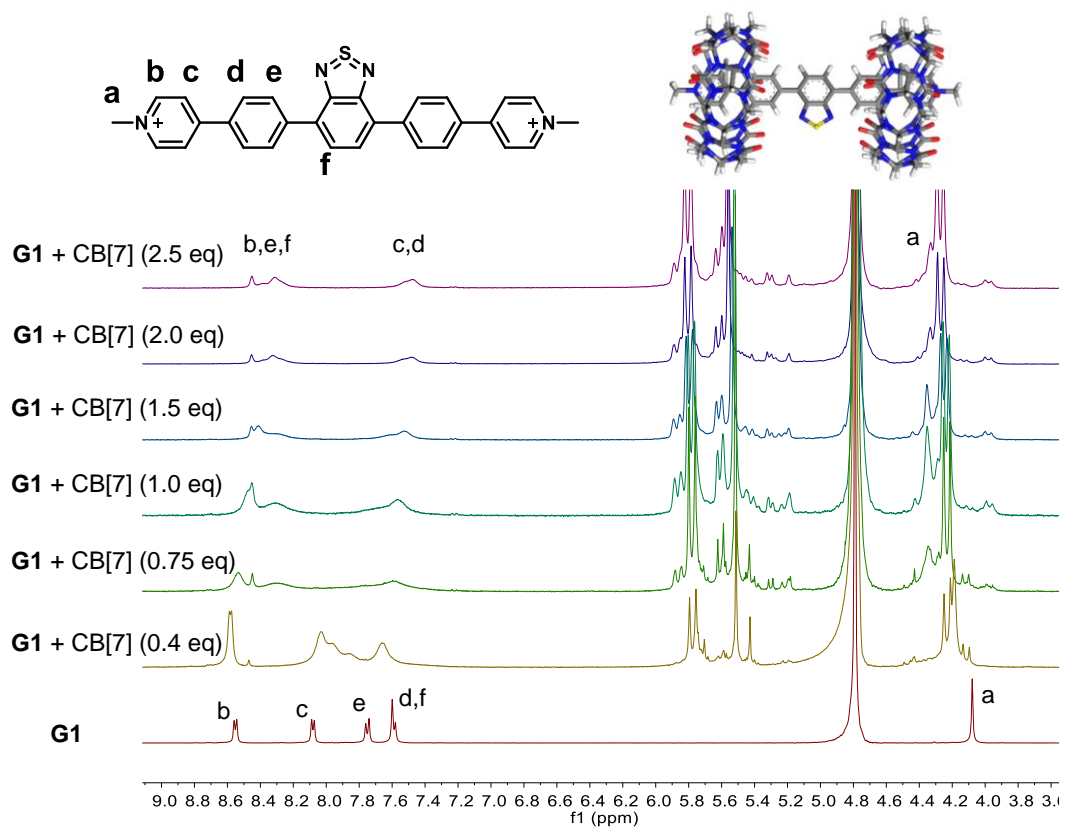

**Figure S7.**  $^1\text{H}$  NMR spectra (400 MHz) of the mixture of **G1** (1.0 mM) and CB[7] (0 to 2.5 equiv.).

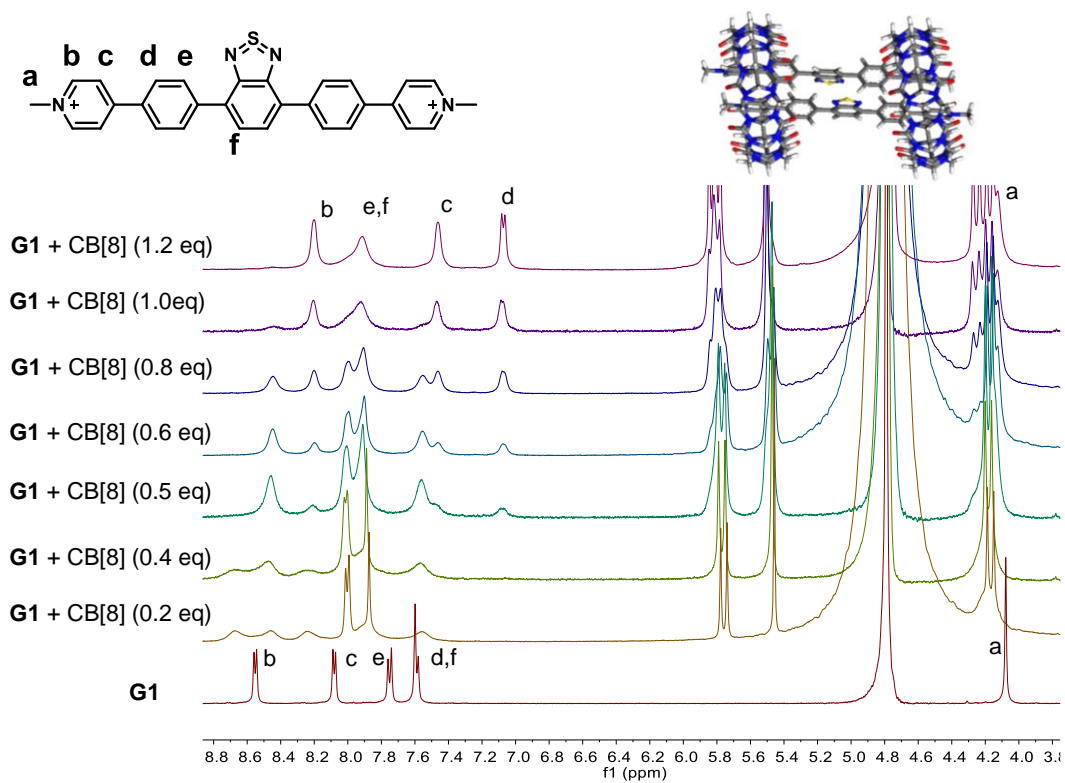

**Figure S8.**  $^1\text{H}$  NMR spectra (400 MHz) of the mixture of **G1** (1.0 mM) and CB[8] (0 to 1.2 equiv.).

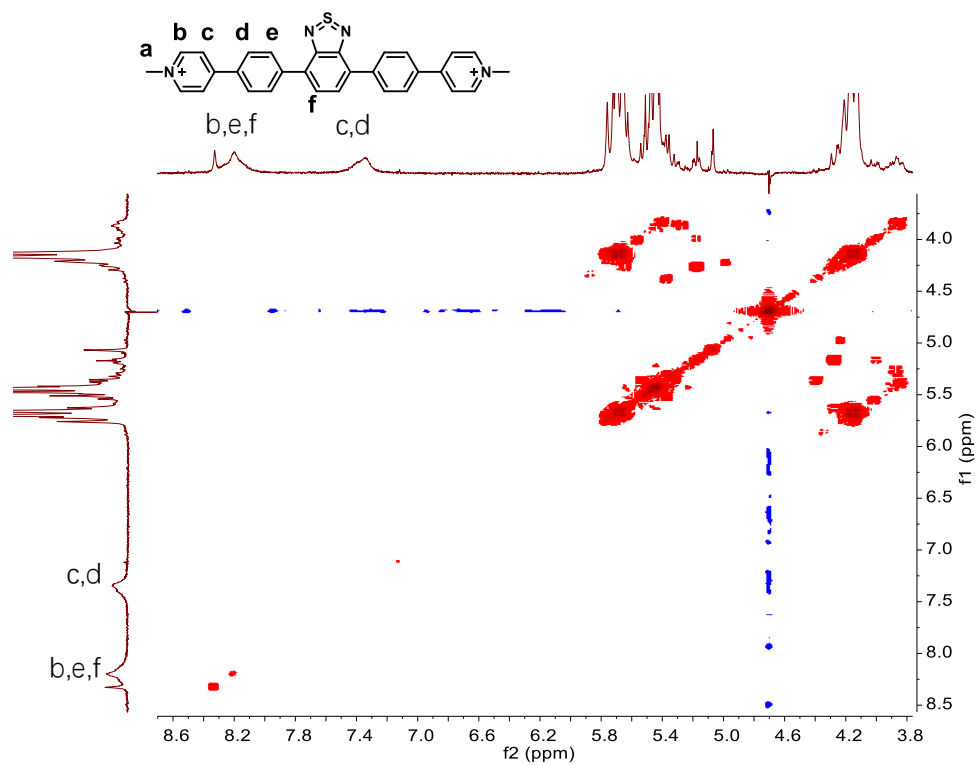

**Figure S9.** 2D  $^1\text{H}$ - $^1\text{H}$  COSY NMR spectrum (400 MHz,  $\text{D}_2\text{O}$ , 298 K) of  $\text{G1}-(\text{CB}[7])_2$ .

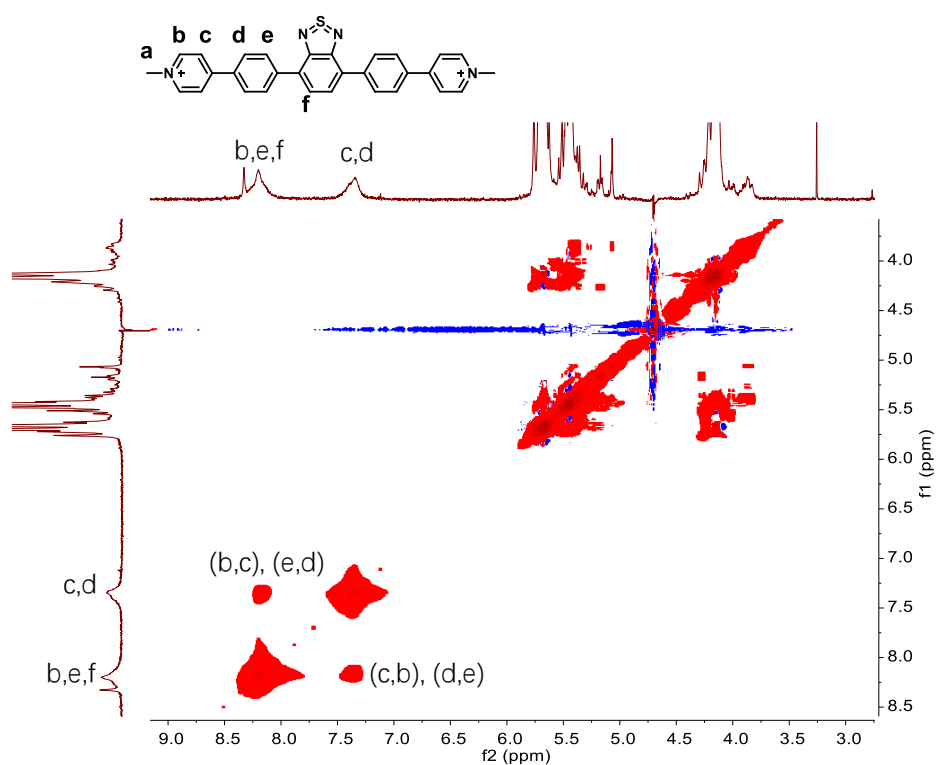

**Figure S10.** 2D  $^1\text{H}$ - $^1\text{H}$  NOESY NMR spectrum (400 MHz,  $\text{D}_2\text{O}$ , 298 K) of  $\text{G1}-(\text{CB}[7])_2$ .



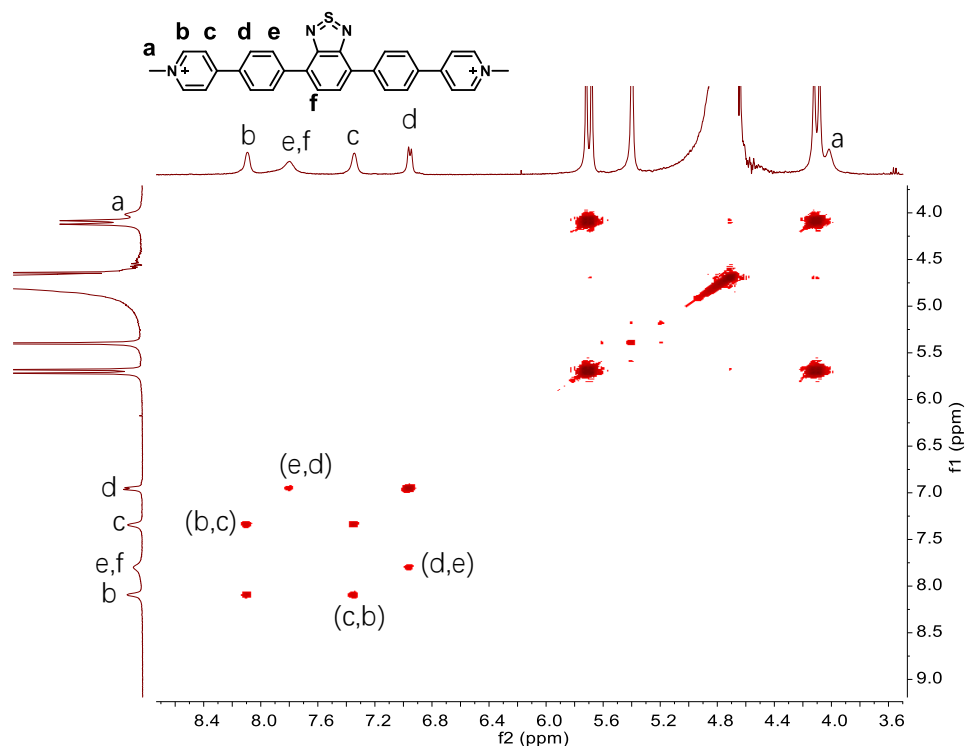

**Figure S11.** 2D  $^1\text{H}$ - $^1\text{H}$  COSY NMR spectrum (400 MHz,  $\text{D}_2\text{O}$ , 298 K) of  $(\text{G1})_2\text{C}(\text{CB}[8])_2$ .

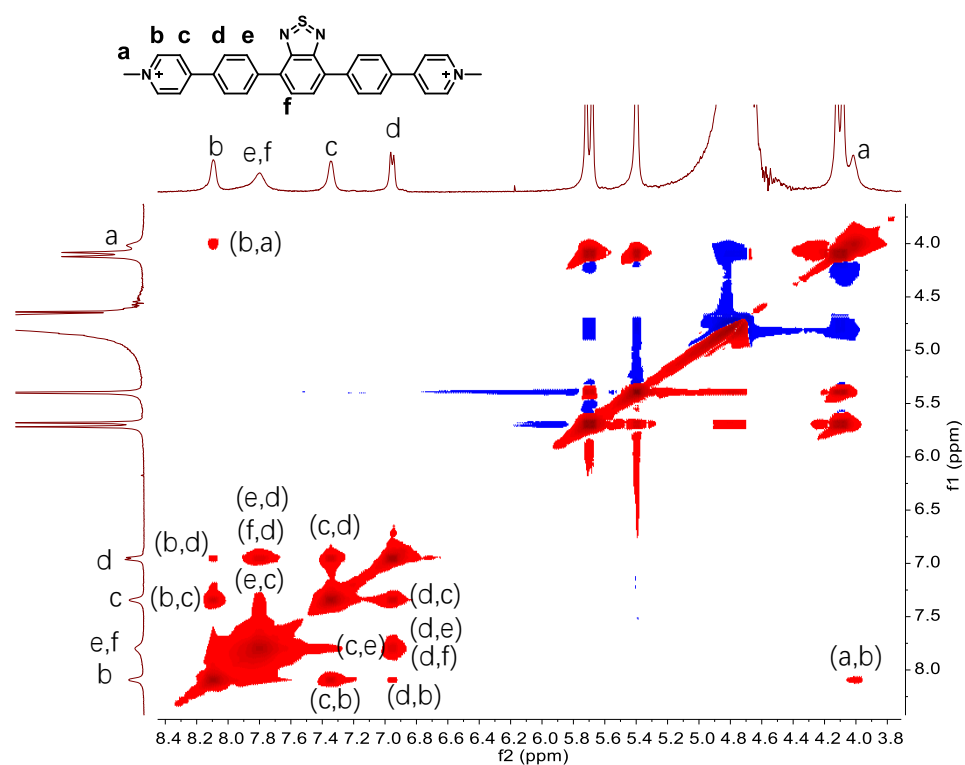

**Figure S12.** 2D  $^1\text{H}$ - $^1\text{H}$  NOESY NMR spectrum (400 MHz,  $\text{D}_2\text{O}$ , 298 K) of  $(\text{G1})_2\text{C}(\text{CB}[8])_2$ .

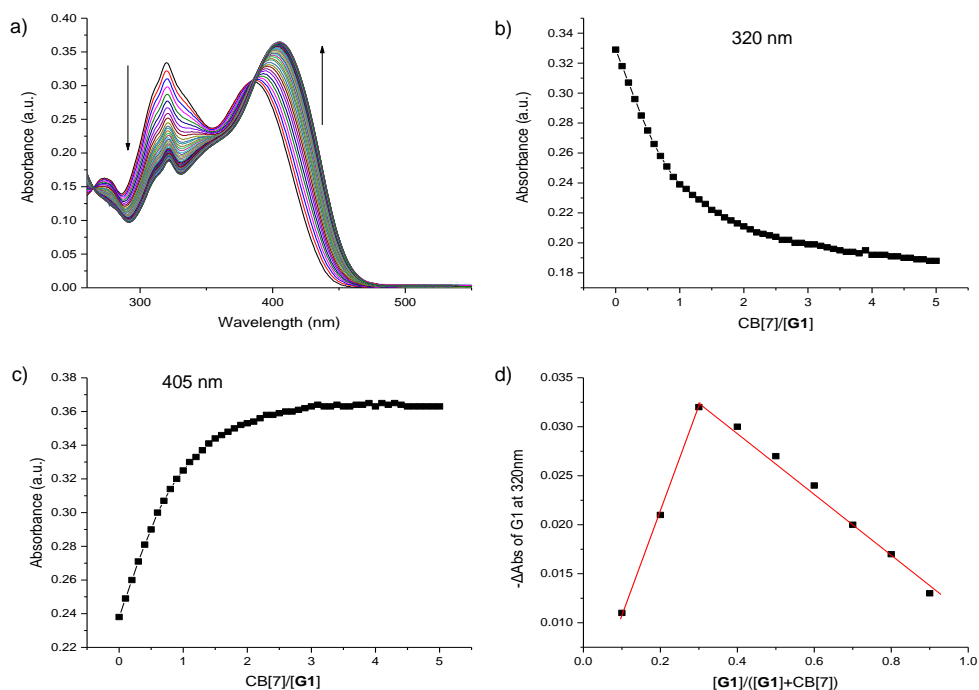

**Figure S13.** a) UV-vis spectroscopy of **G1** (10 μM) with the addition of CB[7] (0-5.0 equiv.) in water at 25 °C, b,c) the plot of the absorbance change at 320 nm and 405 nm, Job's plot indicated a stoichiometry of 1:2 of **G1** and CB[7].  $[G1] + [CB[7]] = 0.01$  mM,  $T = 296$  K.

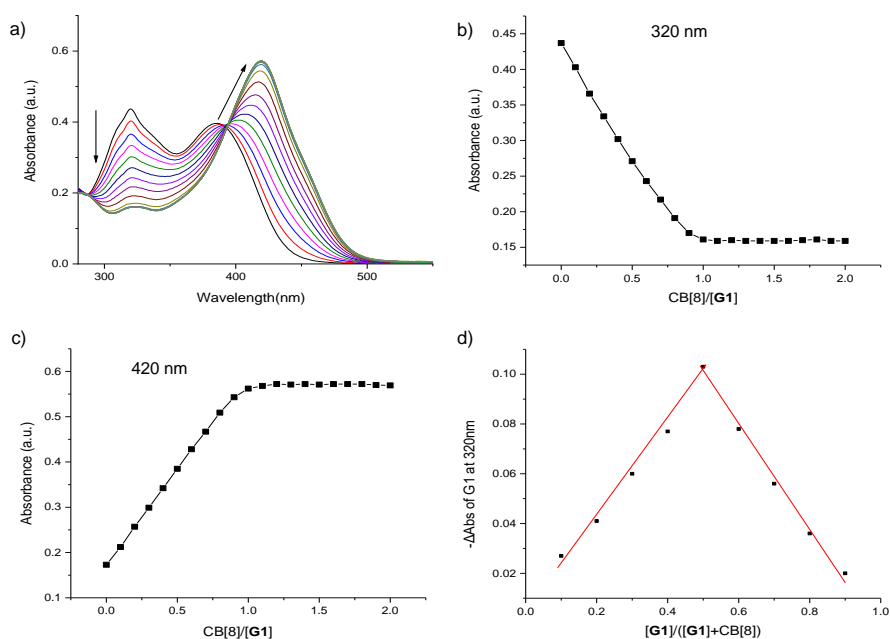

**Figure S14.** a) UV-vis spectroscopy of **G1** (10 μM) with the addition of CB[8] (0-2.0 equiv.) in water at 25 °C, b,c) the plot of the absorbance change at 320 nm and 420 nm, Job's plot indicated a stoichiometry of 1:1 of **G1** and CB[8].  $[G1] + [CB[8]] = 0.01$  mM,  $T = 298$  K.

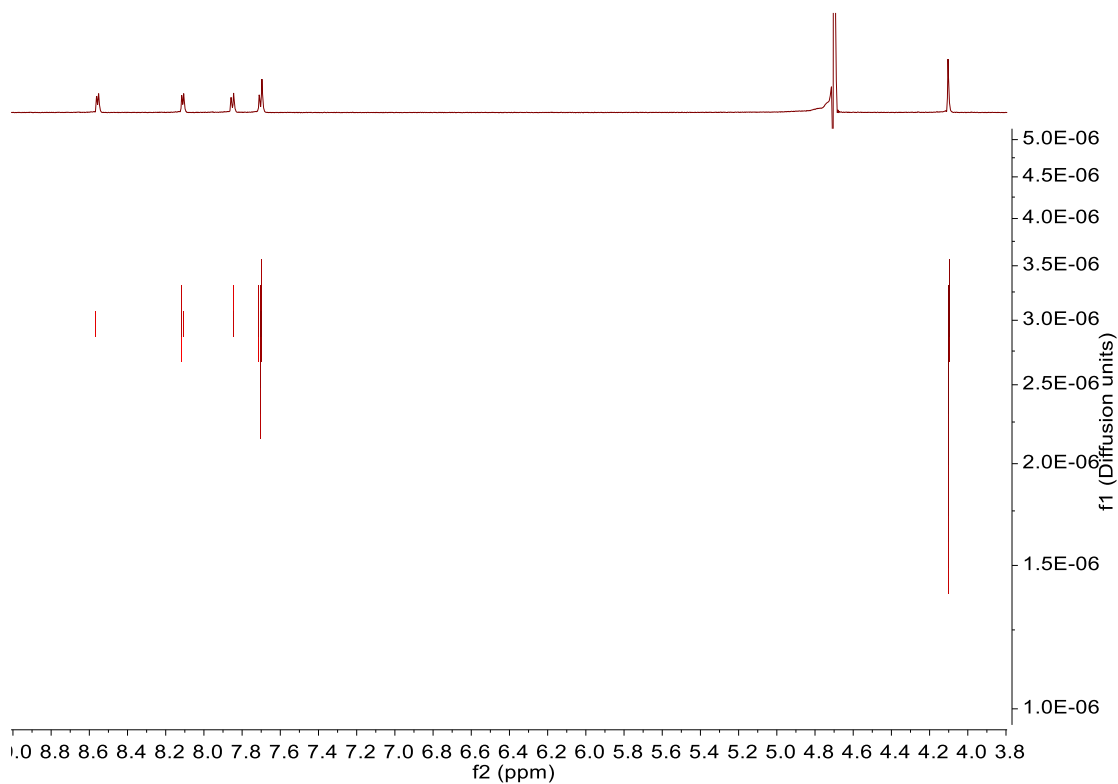

**Figure S15.** 2D diffusion-ordered NMR spectroscopy (DOSY) of **G1** (600 MHz, D<sub>2</sub>O, 298 K).

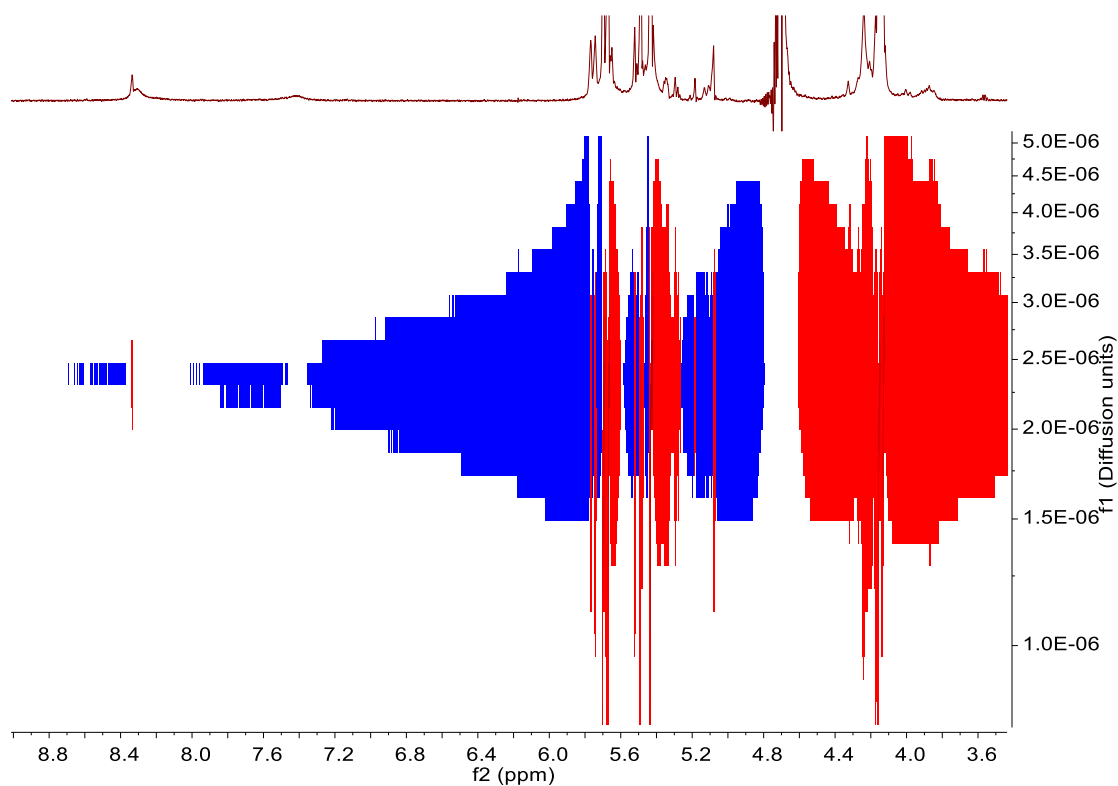

**Figure S16.** 2D diffusion-ordered NMR spectroscopy (DOSY) of **G1**@(CB[7])<sub>2</sub> (600 MHz, D<sub>2</sub>O, 298 K).

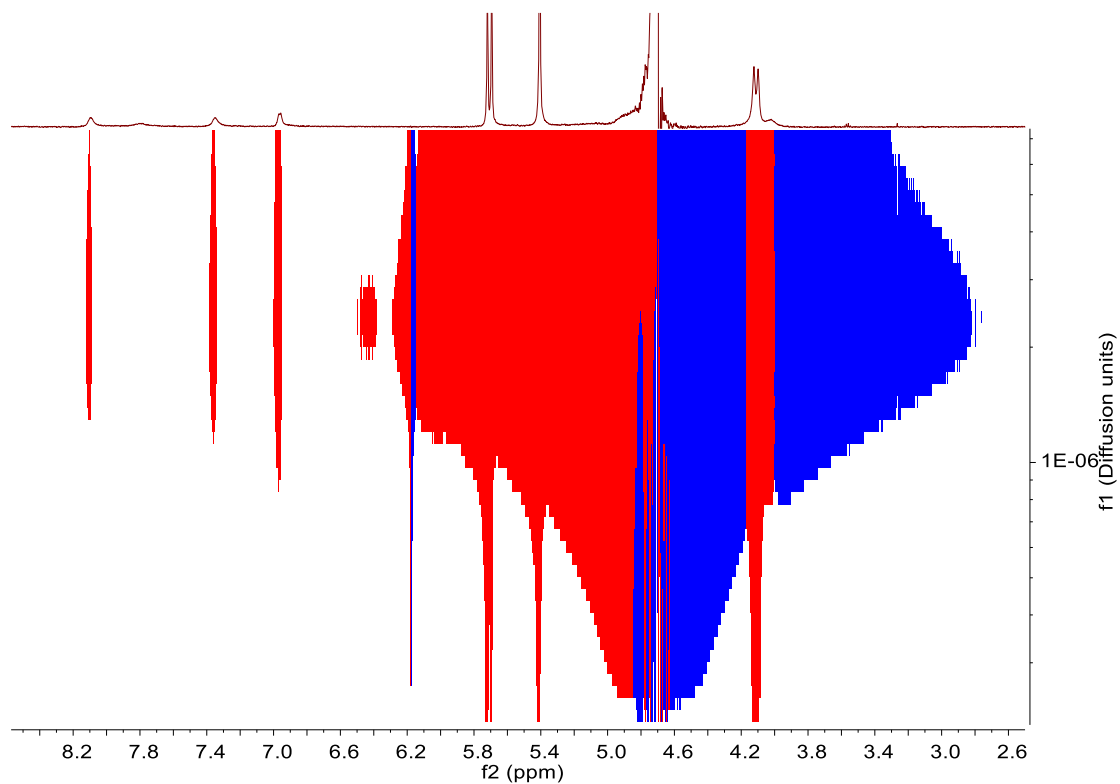

**Figure S17.** 2D diffusion-ordered NMR spectroscopy (DOSY) of  $(\text{G1})_2\text{C}(\text{CB}[8])_2$  (600 MHz,  $\text{D}_2\text{O}$ , 298 K).

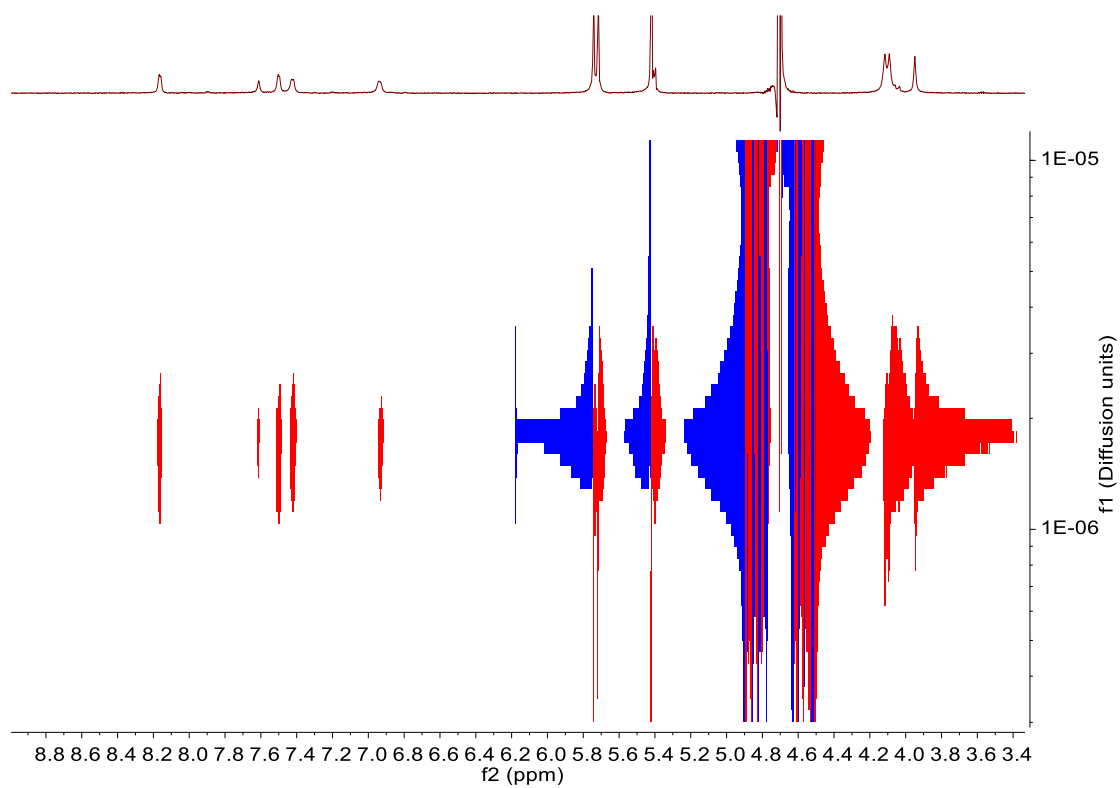

**Figure S18.** 2D diffusion-ordered NMR spectroscopy (DOSY) of  $(\text{G1})_3\text{C}(\text{CB}[10])_2$  (600 MHz,  $\text{D}_2\text{O}$ , 298 K).

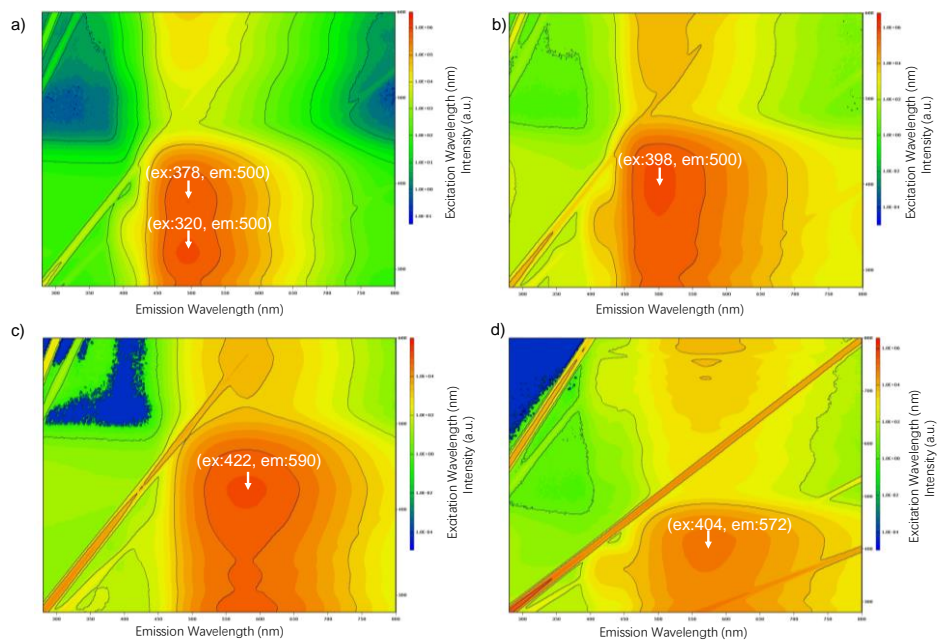

**Figure S19.** 2D fluorescence spectroscopy of (a) **G1**, (b) **G1/(CB[7])<sub>2</sub>**, (c) **(G1)<sub>2</sub>/(CB[8])<sub>2</sub>** and (d) **(G1)<sub>3</sub>/(CB[10])<sub>2</sub>** in water ( $[G1] = 10 \mu\text{M}$ ).

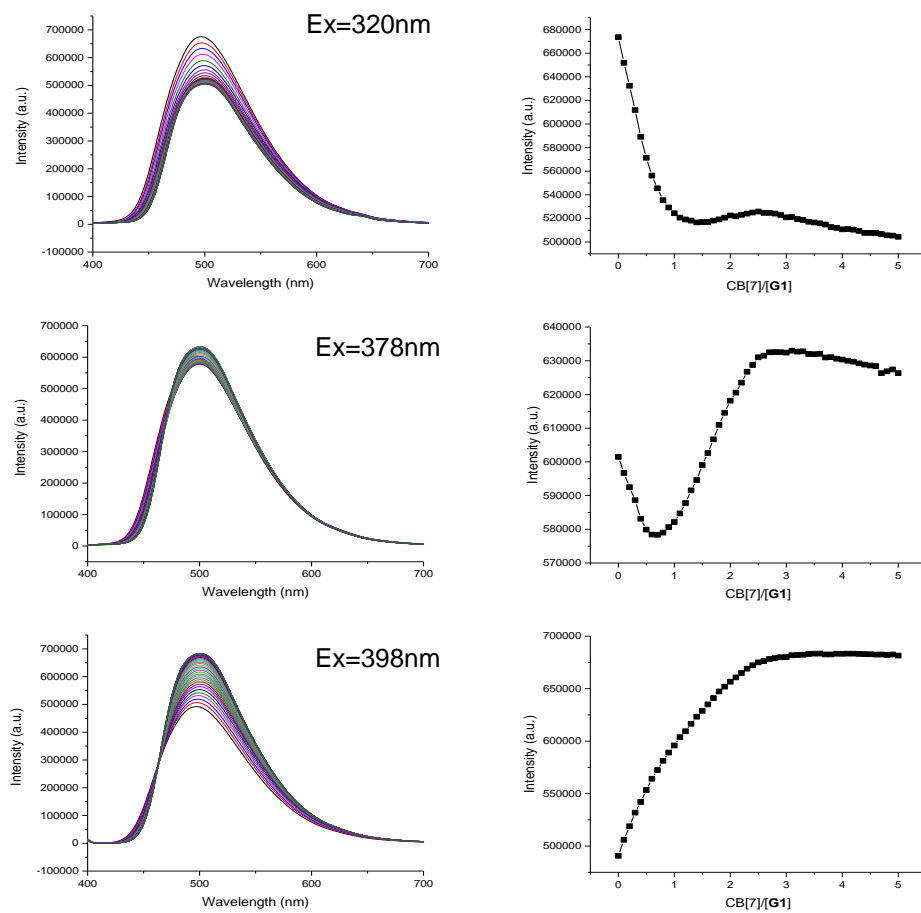

**Figure S20.** Fluorescence spectroscopy of **G1** ( $10 \mu\text{M}$ ) with the addition of **CB[7]** (0-5.0 equiv.) in water at 298 K ( $\lambda_{\text{ex}} = 320, 378$  and  $398 \text{ nm}$ ).

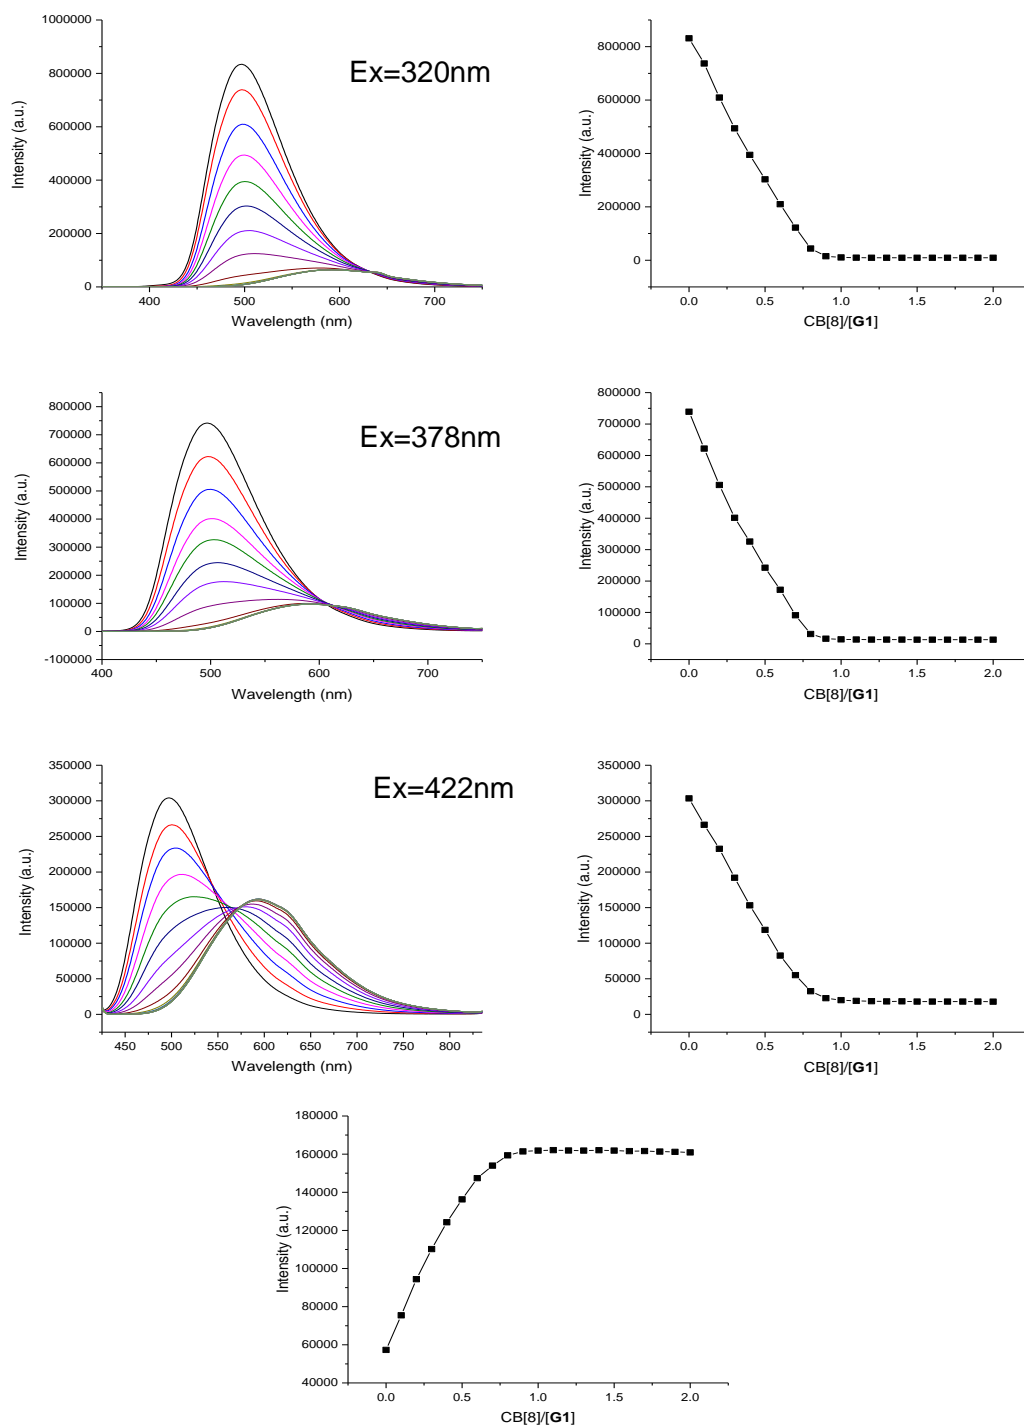

**Figure S21.** Fluorescence spectroscopy of G1 (10  $\mu\text{M}$ ) with the addition of CB[8] (0-2.0 equiv.) in water at 298 K ( $\lambda_{\text{ex}} = 320, 378$  and 422 nm).

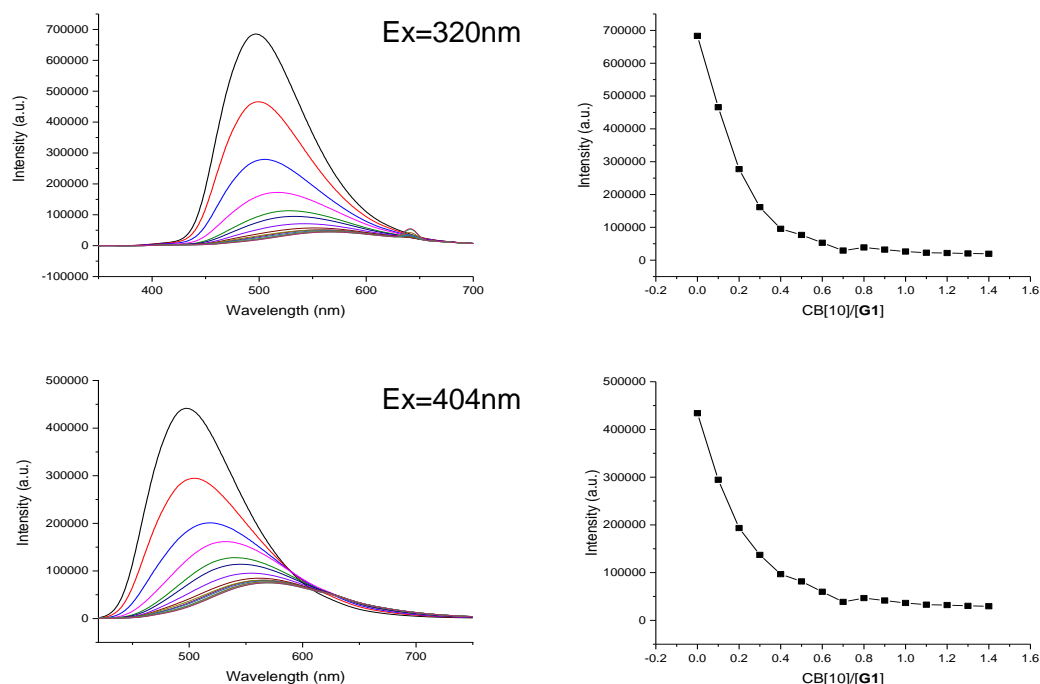

**Figure S22.** Fluorescence spectroscopy of **G1** (10  $\mu\text{M}$ ) with the addition of **CB[10]** (0-1.4 equiv.) in water at 298 K ( $\lambda_{\text{ex}} = 320, 404 \text{ nm}$ ).

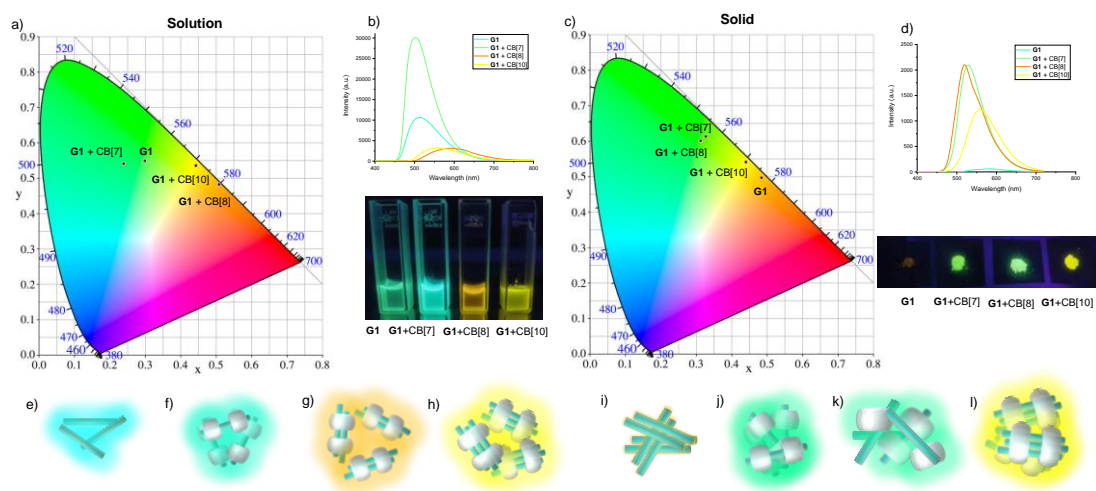

**Figure S23.** The fluorescence spectra of **G1**, **G1** $\subset$ (**CB[7]**)<sub>2</sub>, (**G1**)<sub>2</sub> $\subset$ (**CB[8]**)<sub>2</sub> and (**G1**)<sub>3</sub> $\subset$ (**CB[10]**)<sub>2</sub> in solution (1.0 mM) (b) and solid state (d). The 1931 CIE chromaticity diagram illustrating the luminescent color changes of **G1**, **G1** $\subset$ (**CB[7]**)<sub>2</sub>, (**G1**)<sub>2</sub> $\subset$ (**CB[8]**)<sub>2</sub> and (**G1**)<sub>3</sub> $\subset$ (**CB[10]**)<sub>2</sub> in solution (1.0 mM) (a) and solid state (c), corresponding to (b) and (d), respectively. The schematic illustrations of **G1**, **G1** $\subset$ (**CB[7]**)<sub>2</sub>, (**G1**)<sub>2</sub> $\subset$ (**CB[8]**)<sub>2</sub> and (**G1**)<sub>3</sub> $\subset$ (**CB[10]**)<sub>2</sub> in solution (e-h) and solid state (i-l).

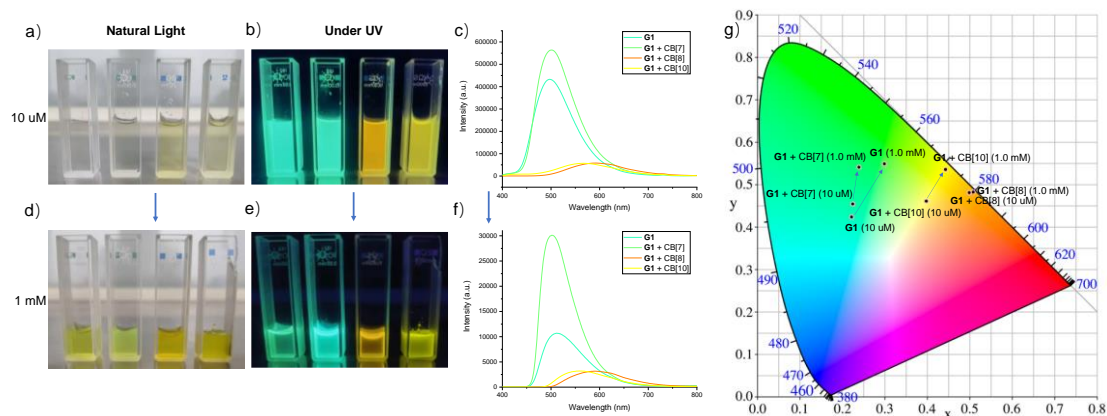

**Figure S24.** (a-b) The solution of **G1**, **G1**c(CB[7])<sub>2</sub>, (**G1**)<sub>2</sub>c(CB[8])<sub>2</sub> and (**G1**)<sub>3</sub>c(CB[10])<sub>2</sub> under natural light and UV(365 nm) ([**G1**] = 10 μM). (c) Emission spectra ([**G1**] = 10 μM, λ<sub>ex</sub> = 365 nm, H<sub>2</sub>O, 298 K) of **G1**, **G1**c(CB[7])<sub>2</sub>, (**G1**)<sub>2</sub>c(CB[8])<sub>2</sub> and (**G1**)<sub>3</sub>c(CB[10])<sub>2</sub>. (d-e) The solution of **G1**, **G1**c(CB[7])<sub>2</sub>, (**G1**)<sub>2</sub>c(CB[8])<sub>2</sub> and (**G1**)<sub>3</sub>c(CB[10])<sub>2</sub> under natural light and UV(365 nm) ([**G1**] = 1.0 mM). (f) Emission spectra ([**G1**] = 1.0 mM, λ<sub>ex</sub> = 365 nm, H<sub>2</sub>O, 298 K) of **G1**, **G1**c(CB[7])<sub>2</sub>, (**G1**)<sub>2</sub>c(CB[8])<sub>2</sub> and (**G1**)<sub>3</sub>c(CB[10])<sub>2</sub>. (g) Chromaticity coordinate (CIE) of **G1**, **G1**c(CB[7])<sub>2</sub>, (**G1**)<sub>2</sub>c(CB[8])<sub>2</sub> and (**G1**)<sub>3</sub>c(CB[10])<sub>2</sub> in different concentration, corresponding to c) and f).



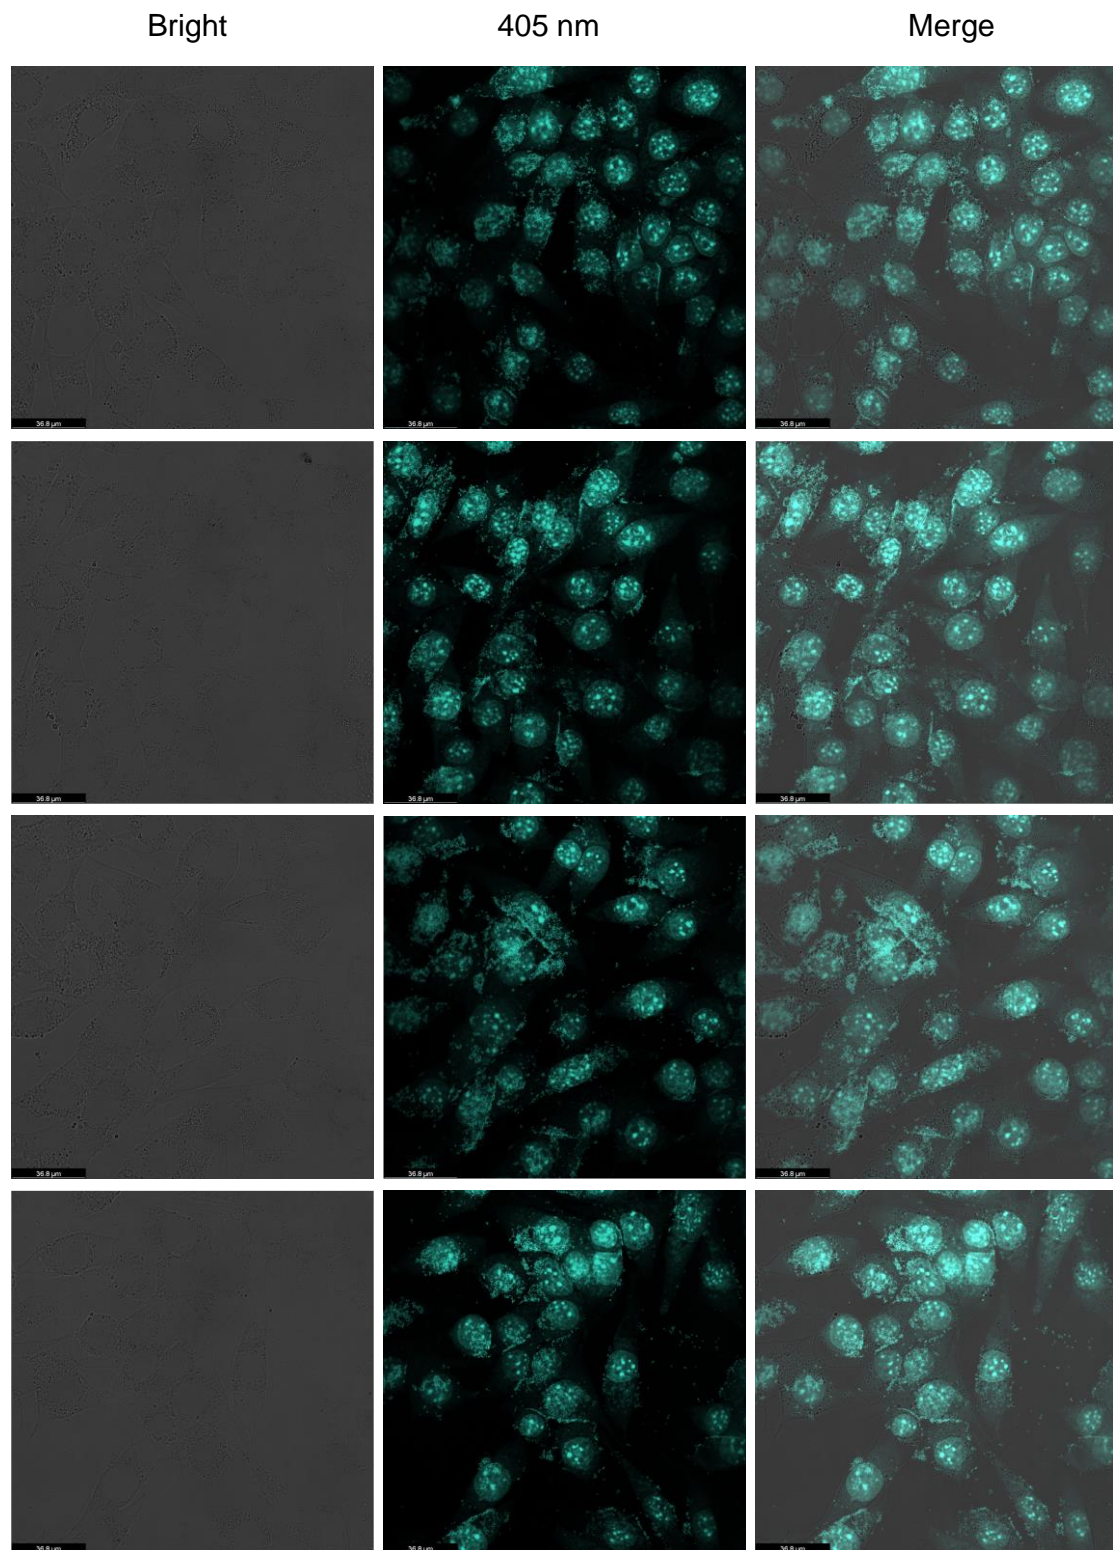

**Figure S25.** Bright field (left), G1 (middle), and merge (right) confocal microscopic images of B16 cells.

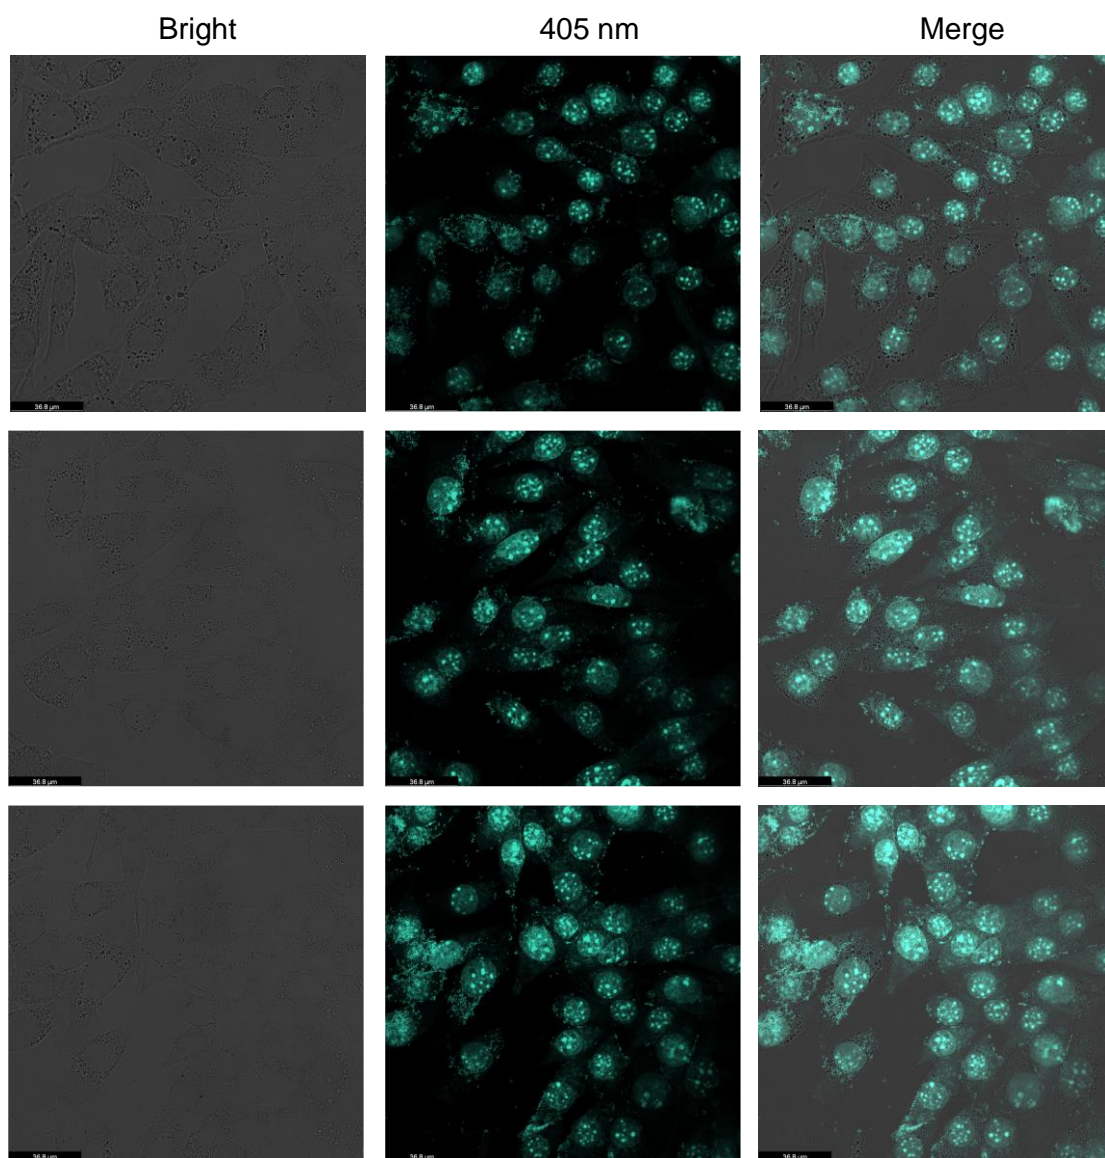

**Figure S26.** Bright field (left) of  $G1\subset(CB[7])_2$  complex (middle), and merge (right) confocal microscopic images of B16 cells.



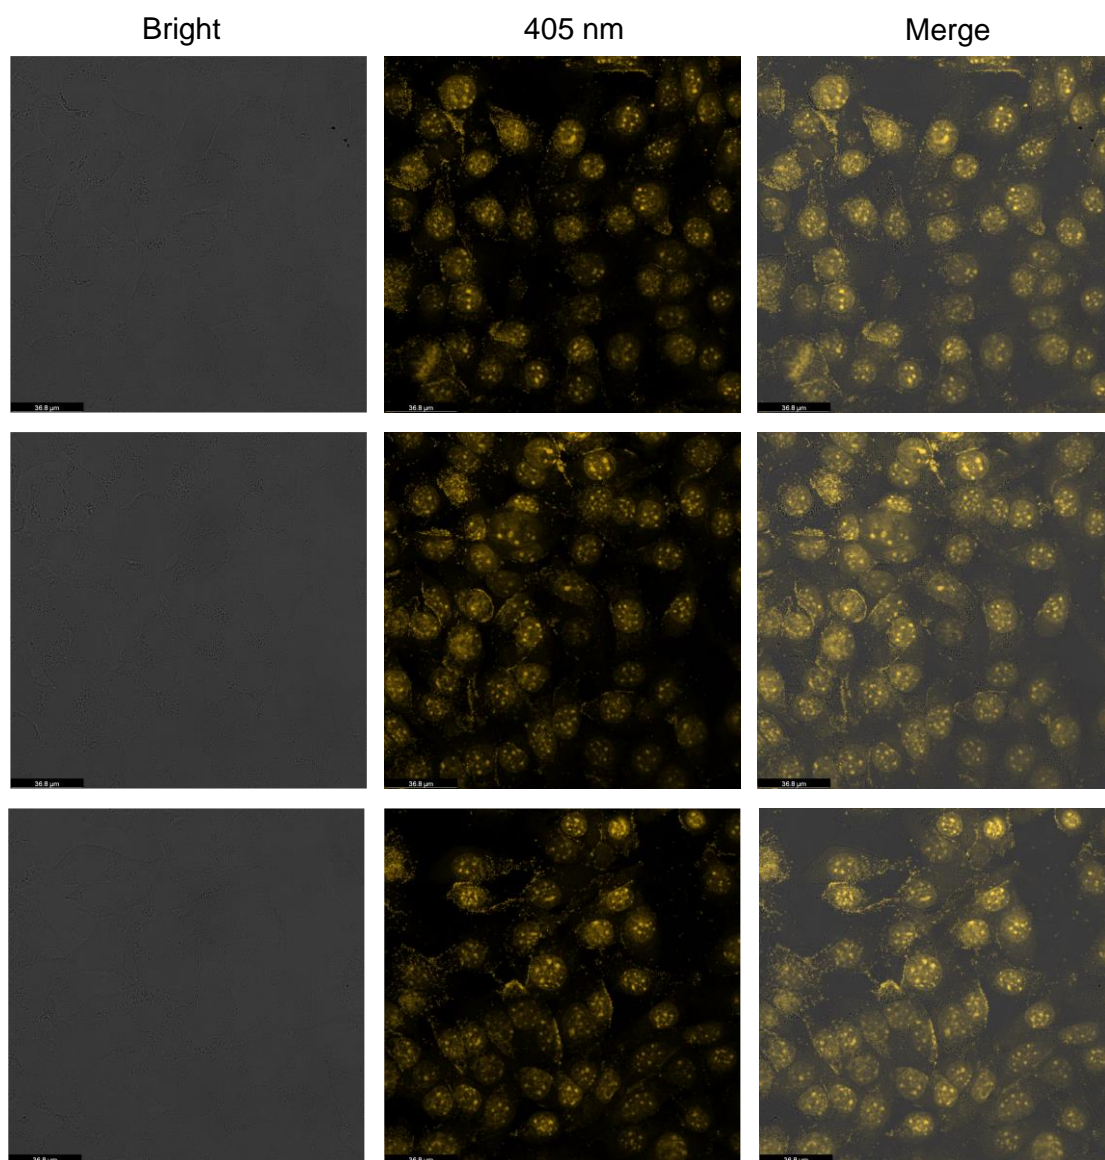

**Figure S27.** Bright field (left),  $(\mathbf{G1})_2\subset(\text{CB}[8])_2$  complex (middle), and merge (right) confocal microscopic images of B16 cells.

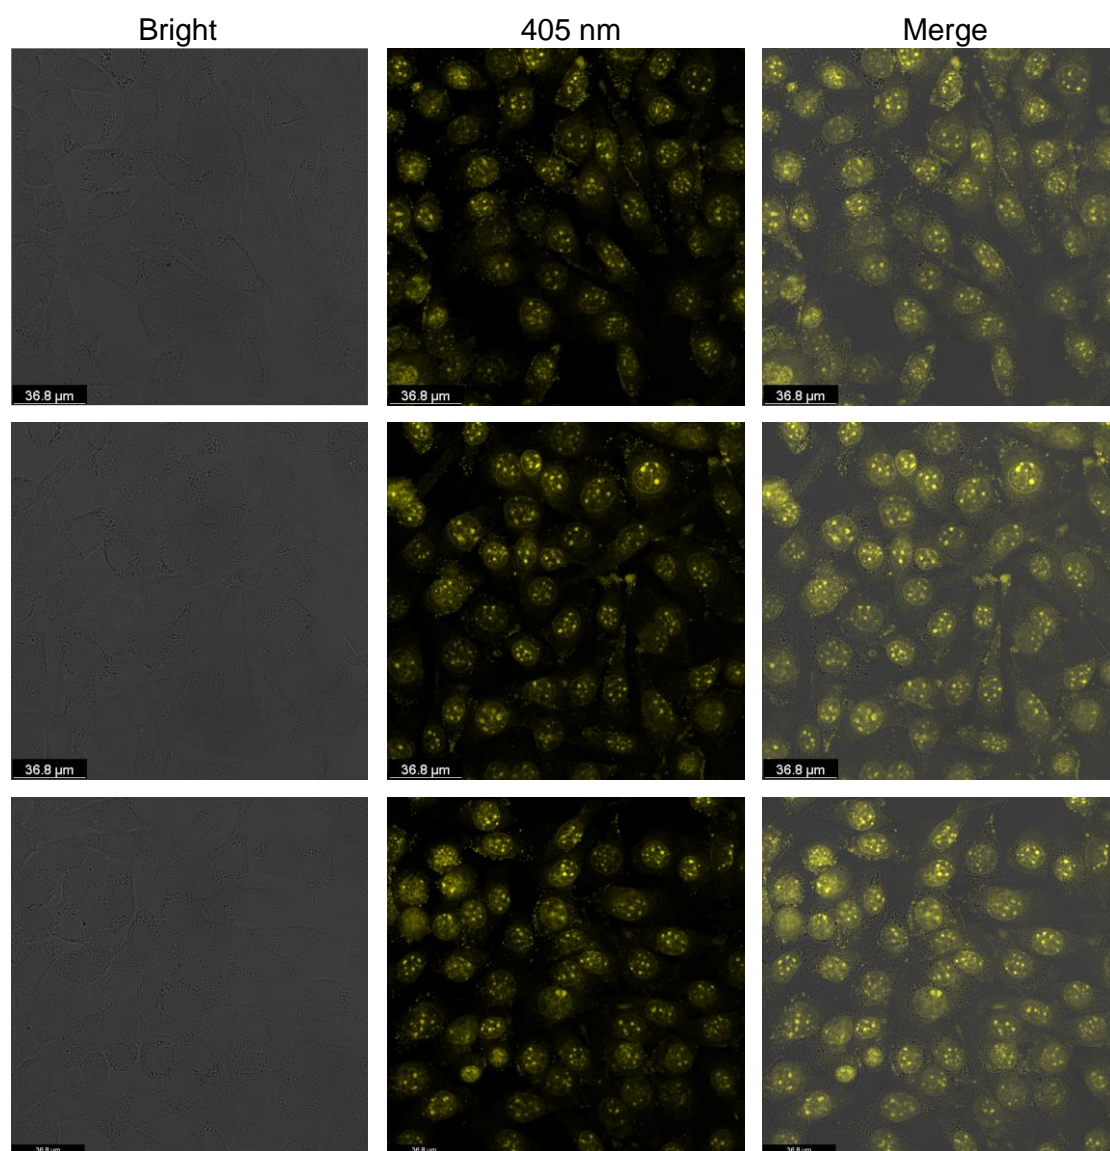

**Figure S28.** Bright field (left),  $(\text{G1})_3\text{C}(\text{CB}[10])_2$  complex (middle), and merge (right) confocal microscopic images of B16 cells.

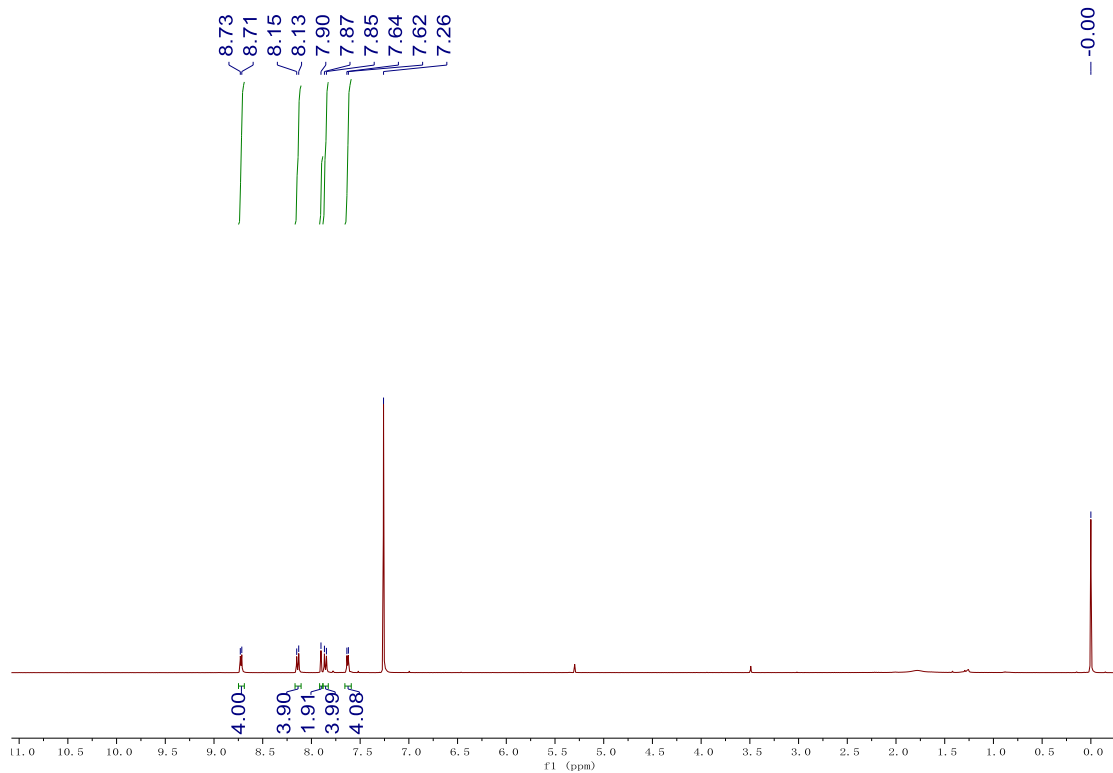

**Figure S29.**  $^1\text{H}$  NMR spectrum (400 MHz) of compound **2** in  $\text{CDCl}_3$

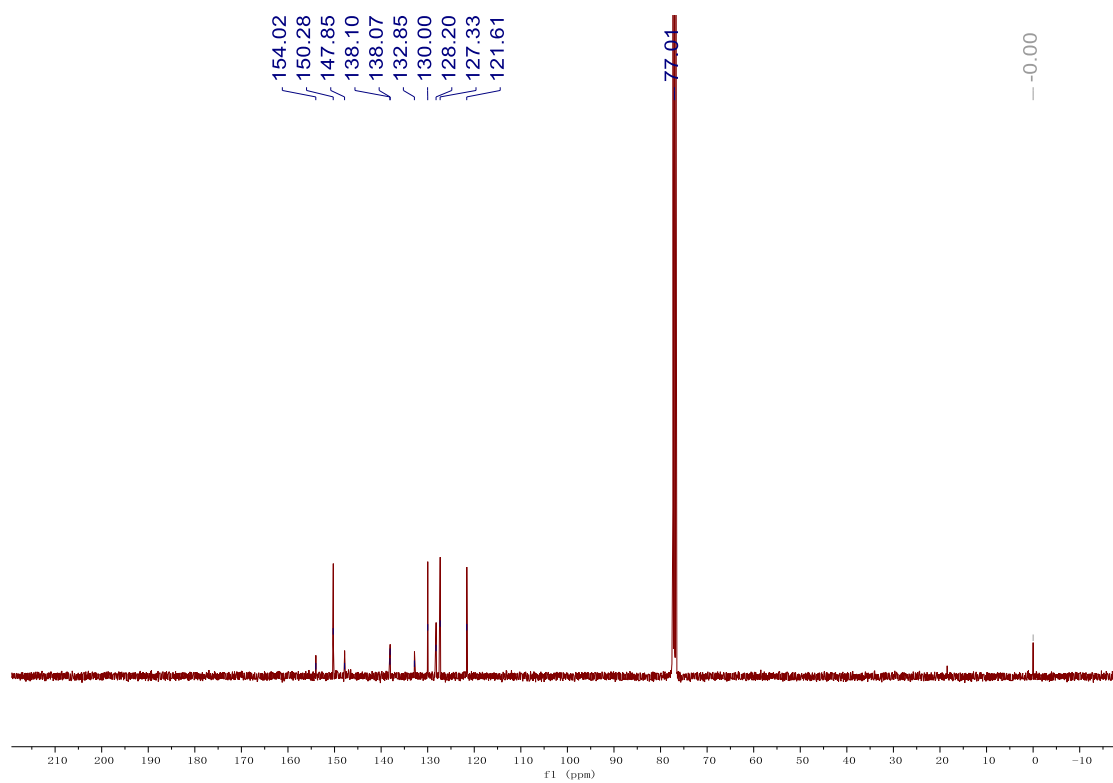

**Figure S30.**  $^{13}\text{C}$  NMR spectrum (100 MHz) of compound **2** in  $\text{CDCl}_3$ .

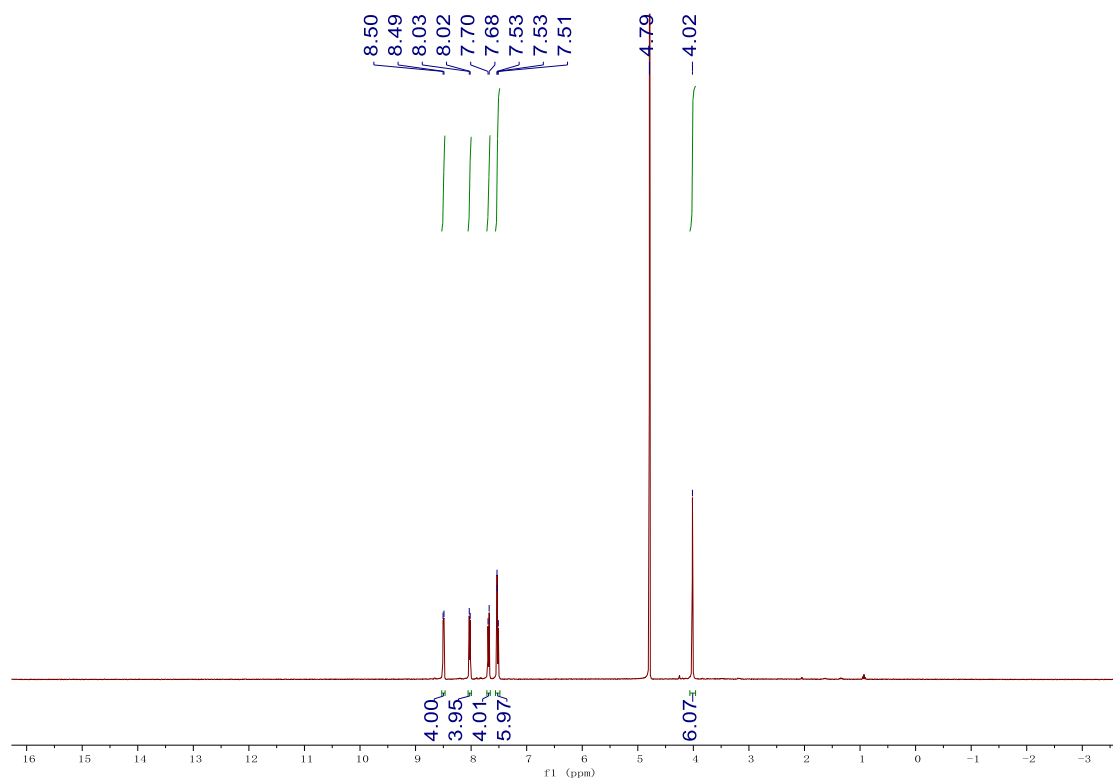

**Figure S31.**  $^1\text{H}$  NMR spectrum (400 MHz) of compound **G1** in  $\text{D}_2\text{O}$ .

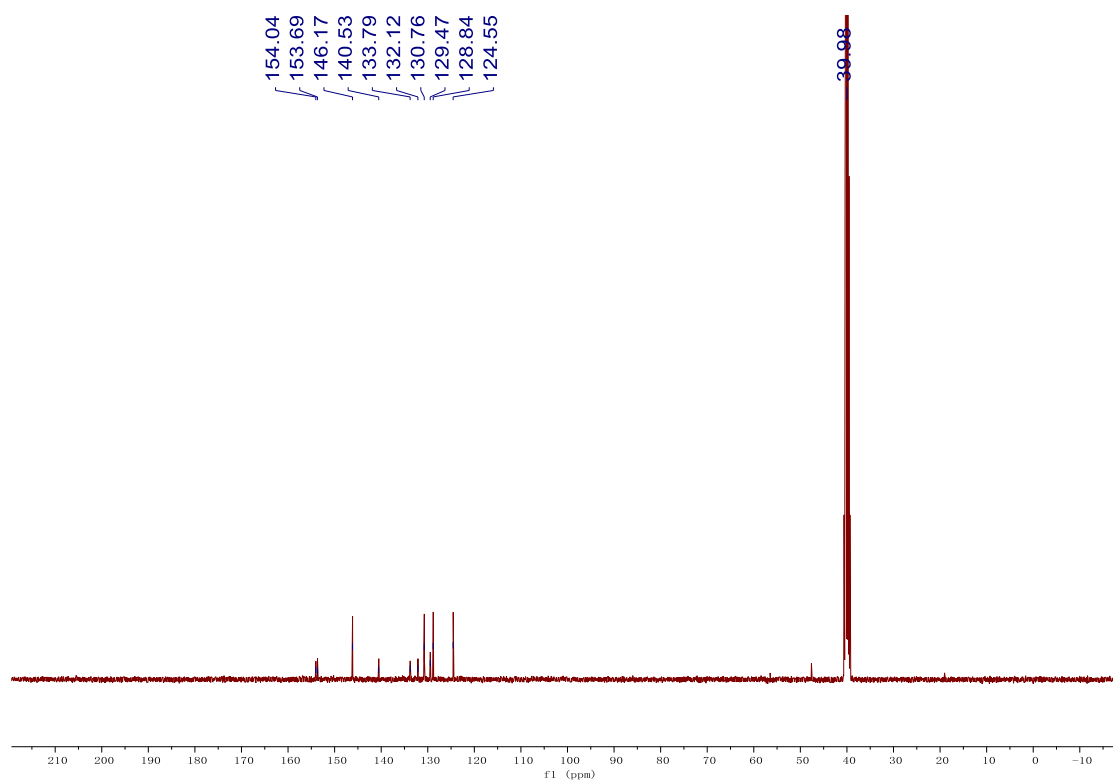

**Figure S32.**  $^{13}\text{C}$  NMR spectrum (100 MHz) of compound **G1** in  $\text{DMSO-d}_6$ .

Atomic coordinates of the minimized  $3\text{G1}\subset 2\text{CB}[10]$  complex:

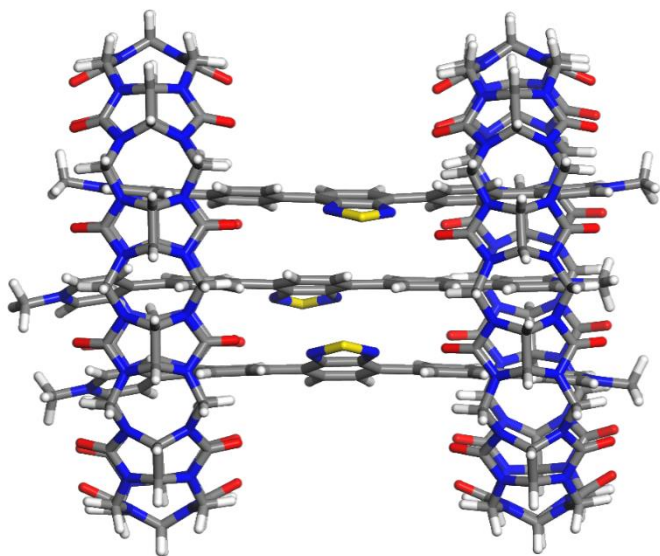

537

|   |           |          |          |
|---|-----------|----------|----------|
| C | -36.42700 | 15.60600 | 22.88000 |
| C | -36.21500 | 15.56400 | 25.84000 |
| C | -37.51100 | 15.83800 | 23.74300 |
| C | -35.18900 | 15.30500 | 23.54700 |
| C | -35.07800 | 15.29200 | 25.00100 |
| C | -37.40900 | 15.80300 | 25.13700 |
| H | -38.48400 | 16.09200 | 23.32800 |
| H | -38.32100 | 15.99800 | 25.69600 |
| N | -34.04800 | 14.95200 | 22.92600 |
| S | -32.92700 | 14.63500 | 24.09200 |
| N | -33.84700 | 14.94300 | 25.43000 |
| C | -36.16000 | 15.57200 | 27.29900 |
| C | -36.05300 | 15.52700 | 30.17600 |
| C | -37.33500 | 15.55700 | 28.09400 |
| C | -34.93100 | 15.59600 | 28.00200 |
| C | -34.88200 | 15.56200 | 29.38300 |
| C | -37.28500 | 15.53600 | 29.48000 |
| H | -38.31700 | 15.52600 | 27.62900 |
| H | -33.99700 | 15.63800 | 27.45000 |
| H | -33.89500 | 15.57300 | 29.83900 |
| H | -38.23000 | 15.50800 | 30.02100 |
| C | -36.56000 | 15.66200 | 21.42700 |
| C | -36.81800 | 15.71600 | 18.57300 |
| C | -35.42700 | 15.72100 | 20.57500 |
| C | -37.82900 | 15.67100 | 20.79700 |
| C | -37.95600 | 15.70700 | 19.41500 |
| C | -35.55100 | 15.74600 | 19.19700 |
| H | -34.43400 | 15.74000 | 21.01100 |

|   |           |          |          |
|---|-----------|----------|----------|
| H | -38.73900 | 15.58900 | 21.38700 |
| H | -38.95700 | 15.66300 | 18.98500 |
| H | -34.63800 | 15.81700 | 18.60300 |
| C | -35.96800 | 15.50300 | 31.62700 |
| N | -35.76100 | 15.53000 | 34.44800 |
| C | -37.11000 | 15.45500 | 32.47100 |
| C | -34.71800 | 15.55000 | 32.30000 |
| C | -34.63600 | 15.57000 | 33.67200 |
| C | -36.98700 | 15.46400 | 33.84400 |
| H | -38.11700 | 15.40800 | 32.06400 |
| H | -33.77700 | 15.59000 | 31.76000 |
| H | -33.68300 | 15.62300 | 34.19200 |
| H | -37.84300 | 15.42400 | 34.51400 |
| C | -36.93500 | 15.62600 | 17.12800 |
| N | -37.19600 | 15.24600 | 14.35100 |
| C | -35.87700 | 15.10900 | 16.33700 |
| C | -38.11900 | 15.97900 | 16.43200 |
| C | -38.22400 | 15.79200 | 15.07200 |
| C | -36.02700 | 14.91700 | 14.98200 |
| H | -34.94100 | 14.78700 | 16.78800 |
| H | -38.97300 | 16.41400 | 16.94900 |
| H | -39.11100 | 16.06700 | 14.50800 |
| H | -35.24500 | 14.48600 | 14.36200 |
| C | -35.63400 | 15.51300 | 35.91000 |
| H | -35.22800 | 14.54700 | 36.24000 |
| H | -36.61800 | 15.67400 | 36.36000 |
| H | -34.94900 | 16.30700 | 36.22900 |
| C | -37.39000 | 14.95100 | 12.92500 |
| H | -38.01500 | 14.05400 | 12.81200 |
| H | -36.41600 | 14.78500 | 12.45700 |
| H | -37.88600 | 15.80000 | 12.44400 |
| C | -36.79300 | 12.24200 | 23.99800 |
| C | -36.80000 | 12.23000 | 26.96500 |
| C | -35.67000 | 11.92000 | 24.78500 |
| C | -37.97300 | 12.58400 | 24.75000 |
| C | -37.97000 | 12.59000 | 26.20800 |
| C | -35.67200 | 11.91300 | 26.18400 |
| H | -34.73900 | 11.64000 | 24.29200 |
| H | -34.74700 | 11.62200 | 26.67900 |
| N | -39.14900 | 12.98200 | 24.22100 |
| S | -40.15400 | 13.34600 | 25.48100 |
| N | -39.13900 | 13.00900 | 26.74000 |
| C | -36.76700 | 12.18400 | 28.42600 |
| C | -36.68900 | 12.05200 | 31.29700 |



|   |           |          |          |
|---|-----------|----------|----------|
| C | -35.54100 | 12.16900 | 29.13900 |
| C | -37.95100 | 12.14800 | 29.20400 |
| C | -37.90900 | 12.08900 | 30.58500 |
| C | -35.50200 | 12.10200 | 30.52400 |
| H | -34.59300 | 12.24900 | 28.61000 |
| H | -38.92300 | 12.18200 | 28.72300 |
| H | -38.86200 | 12.06200 | 31.10900 |
| H | -34.52400 | 12.10200 | 31.00000 |
| C | -36.73800 | 12.22900 | 22.53600 |
| C | -36.62200 | 12.13200 | 19.67200 |
| C | -37.91100 | 12.25200 | 21.74200 |
| C | -35.50100 | 12.18200 | 21.84200 |
| C | -35.44400 | 12.13600 | 20.45800 |
| C | -37.85100 | 12.20700 | 20.36000 |
| H | -38.88600 | 12.30400 | 22.21300 |
| H | -34.55600 | 12.21700 | 22.37800 |
| H | -34.46400 | 12.12900 | 19.98300 |
| H | -38.78900 | 12.18300 | 19.80900 |
| C | -36.67800 | 11.96200 | 32.74900 |
| N | -36.69300 | 11.69000 | 35.56100 |
| C | -35.48000 | 11.94200 | 33.51300 |
| C | -37.88400 | 11.87800 | 33.50000 |
| C | -37.87000 | 11.74900 | 34.87000 |
| C | -35.51200 | 11.80900 | 34.88400 |
| H | -34.49700 | 12.00300 | 33.04700 |
| H | -38.86300 | 11.89100 | 33.02400 |
| H | -38.77800 | 11.66900 | 35.46300 |
| H | -34.61600 | 11.76200 | 35.49600 |
| C | -36.60000 | 11.99500 | 18.22400 |
| N | -36.64900 | 11.53600 | 15.45000 |
| C | -37.72900 | 12.32100 | 17.42600 |
| C | -35.47900 | 11.47300 | 17.53200 |
| C | -35.53000 | 11.24100 | 16.17500 |
| C | -37.73000 | 12.09700 | 16.06700 |
| H | -38.61800 | 12.77000 | 17.86200 |
| H | -34.56600 | 11.19400 | 18.05800 |
| H | -34.71500 | 10.78300 | 15.62300 |
| H | -38.57500 | 12.34700 | 15.43000 |
| C | -36.70200 | 11.50700 | 37.01800 |
| H | -36.76700 | 12.48400 | 37.51700 |
| H | -35.78300 | 10.99300 | 37.31300 |
| H | -37.56500 | 10.89200 | 37.28900 |
| C | -36.67100 | 11.24800 | 14.01000 |
| H | -36.08300 | 12.00000 | 13.46700 |

|   |           |          |          |
|---|-----------|----------|----------|
| H | -37.70700 | 11.25000 | 13.66400 |
| H | -36.23700 | 10.25600 | 13.84300 |
| C | -36.65700 | 19.05500 | 24.59000 |
| C | -36.51800 | 18.99200 | 27.54400 |
| C | -35.45400 | 19.12800 | 25.31900 |
| C | -37.84300 | 18.90000 | 25.39100 |
| C | -37.76200 | 18.83500 | 26.84400 |
| C | -35.38700 | 19.10600 | 26.71700 |
| H | -34.51700 | 19.25700 | 24.78000 |
| H | -34.40600 | 19.22900 | 27.17400 |
| N | -39.09800 | 18.71900 | 24.92300 |
| S | -40.07100 | 18.45300 | 26.24000 |
| N | -38.94400 | 18.57500 | 27.43600 |
| C | -36.43500 | 19.04600 | 29.00000 |
| C | -36.29700 | 19.12500 | 31.86000 |
| C | -35.22000 | 18.80600 | 29.68600 |
| C | -37.56700 | 19.37100 | 29.79000 |
| C | -37.50100 | 19.40600 | 31.17200 |
| C | -35.15600 | 18.84300 | 31.07100 |
| H | -34.31400 | 18.54700 | 29.14300 |
| H | -38.50800 | 19.61600 | 29.30800 |
| H | -38.40100 | 19.69100 | 31.71900 |
| H | -34.20500 | 18.61300 | 31.54700 |
| C | -36.67200 | 19.11000 | 23.13000 |
| C | -36.68400 | 19.21600 | 20.26100 |
| C | -37.85500 | 19.37900 | 22.39900 |
| C | -35.49300 | 18.89300 | 22.37200 |
| C | -35.49900 | 18.95200 | 20.98800 |
| C | -37.85900 | 19.42100 | 21.01500 |
| H | -38.78800 | 19.55400 | 22.92400 |
| H | -34.55600 | 18.62900 | 22.85900 |
| H | -34.56500 | 18.75900 | 20.46900 |
| H | -38.80400 | 19.64700 | 20.52900 |
| C | -36.23900 | 19.14700 | 33.31200 |
| N | -36.13600 | 19.32400 | 36.12200 |
| C | -35.00900 | 19.19000 | 34.01800 |
| C | -37.41300 | 19.15100 | 34.11400 |
| C | -37.34200 | 19.24900 | 35.48600 |
| C | -34.98100 | 19.28000 | 35.39200 |
| H | -34.05400 | 19.20400 | 33.49600 |
| H | -38.40400 | 19.07400 | 33.67200 |
| H | -38.22700 | 19.27100 | 36.11800 |
| H | -34.05500 | 19.33000 | 35.95800 |
| C | -36.70400 | 19.29200 | 18.80800 |

|   |           |          |          |
|---|-----------|----------|----------|
| N | -36.75500 | 19.54300 | 15.99600 |
| C | -37.91900 | 19.37600 | 18.07600 |
| C | -35.51600 | 19.31000 | 18.02800 |
| C | -35.56500 | 19.43300 | 16.65700 |
| C | -37.92100 | 19.50700 | 16.70500 |
| H | -38.89000 | 19.34500 | 18.56500 |
| H | -34.53100 | 19.26200 | 18.48700 |
| H | -34.67800 | 19.45300 | 16.03000 |
| H | -38.83200 | 19.58300 | 16.12000 |
| C | -36.05900 | 19.52700 | 37.57500 |
| H | -35.74200 | 20.55700 | 37.78500 |
| H | -35.33300 | 18.82600 | 38.00300 |
| H | -37.04500 | 19.34800 | 38.01400 |
| C | -36.77400 | 19.80200 | 14.55100 |
| H | -36.65600 | 20.88000 | 14.37100 |
| H | -37.73100 | 19.46500 | 14.14100 |
| H | -35.95400 | 19.25400 | 14.07600 |
| N | -35.57100 | 6.70500  | 19.55600 |
| N | -33.45000 | 7.88300  | 19.53100 |
| N | -32.08700 | 9.65800  | 19.55800 |
| N | -31.52700 | 12.01600 | 19.59200 |
| N | -31.51500 | 14.26900 | 19.63200 |
| O | -33.49400 | 9.31000  | 21.38500 |
| O | -31.85500 | 13.09800 | 21.63400 |
| C | -34.24500 | 6.81800  | 20.11600 |
| H | -33.71600 | 5.86300  | 19.98000 |
| H | -34.35600 | 7.03500  | 21.18500 |
| C | -33.06900 | 8.99000  | 20.27900 |
| C | -31.27600 | 10.69500 | 20.15000 |
| H | -30.21300 | 10.43700 | 20.00000 |
| H | -31.50500 | 10.74100 | 21.22000 |
| C | -31.66000 | 13.12600 | 20.42300 |
| N | -35.40500 | 24.65400 | 16.80700 |
| N | -33.38900 | 23.30300 | 16.91100 |
| N | -32.41000 | 21.29600 | 16.97500 |
| N | -31.92900 | 18.92900 | 17.06900 |
| N | -32.01400 | 16.67500 | 17.16900 |
| O | -33.62600 | 21.88000 | 15.07100 |
| O | -32.90200 | 17.76900 | 15.29600 |
| C | -34.04800 | 24.46300 | 16.34900 |
| H | -33.45700 | 25.35900 | 16.59000 |
| H | -34.08600 | 24.32400 | 15.26200 |
| C | -33.20000 | 22.13400 | 16.19800 |
| C | -31.70600 | 20.18500 | 16.38000 |

|   |           |          |          |
|---|-----------|----------|----------|
| H | -30.62200 | 20.39200 | 16.37000 |
| H | -32.06900 | 20.07900 | 15.35100 |
| C | -32.34800 | 17.79200 | 16.39300 |
| N | -37.64700 | 6.78200  | 16.99400 |
| N | -39.66000 | 8.13100  | 16.88400 |
| N | -40.76300 | 10.07700 | 16.80700 |
| N | -41.40900 | 12.41100 | 16.74200 |
| N | -41.61600 | 14.65400 | 16.70000 |
| O | -39.37900 | 9.50400  | 15.01400 |
| O | -40.63900 | 13.57100 | 14.86800 |
| C | -38.94100 | 6.97900  | 16.38300 |
| H | -39.55500 | 6.07900  | 16.54200 |
| H | -38.77800 | 7.13300  | 15.31000 |
| C | -39.86800 | 9.26400  | 16.11700 |
| C | -41.50400 | 11.10400 | 16.11500 |
| H | -42.56900 | 10.81400 | 16.06300 |
| H | -41.10000 | 11.18600 | 15.10000 |
| C | -41.16300 | 13.54700 | 15.98200 |
| N | -37.75900 | 24.77000 | 19.16300 |
| N | -39.90500 | 23.62900 | 19.10400 |
| N | -41.05100 | 21.70600 | 19.07300 |
| N | -41.67900 | 19.36300 | 19.07800 |
| N | -41.78900 | 17.11000 | 19.11400 |
| O | -39.85200 | 22.26200 | 20.99700 |
| O | -41.06600 | 18.23700 | 21.03200 |
| C | -39.12600 | 24.72800 | 19.63500 |
| H | -39.62300 | 25.67500 | 19.37800 |
| H | -39.09300 | 24.60900 | 20.72400 |
| C | -40.21500 | 22.50500 | 19.85000 |
| C | -41.85700 | 20.67300 | 19.68200 |
| H | -42.92400 | 20.95200 | 19.61900 |
| H | -41.55600 | 20.59900 | 20.73300 |
| C | -41.46500 | 18.23700 | 19.87100 |
| N | -37.63100 | 24.72200 | 16.70900 |
| N | -39.75400 | 23.54800 | 16.65200 |
| N | -40.95700 | 21.66300 | 16.62900 |
| N | -41.60800 | 19.32700 | 16.63100 |
| N | -41.67800 | 17.07700 | 16.66800 |
| O | -39.51400 | 22.08500 | 14.84500 |
| O | -40.74200 | 18.15000 | 14.81000 |
| C | -38.94900 | 24.63100 | 16.12500 |
| H | -39.48200 | 25.58000 | 16.28600 |
| H | -38.82200 | 24.45400 | 15.05100 |
| C | -40.00900 | 22.39800 | 15.92700 |

|   |           |          |          |
|---|-----------|----------|----------|
| C | -41.72300 | 20.62300 | 15.98400 |
| H | -42.78800 | 20.91500 | 15.96200 |
| H | -41.34800 | 20.52200 | 14.95900 |
| C | -41.28400 | 18.18400 | 15.91500 |
| N | -37.79800 | 6.80200  | 19.44700 |
| N | -39.83200 | 8.12400  | 19.33600 |
| N | -40.89800 | 10.09200 | 19.25600 |
| N | -41.52600 | 12.43600 | 19.18900 |
| N | -41.71700 | 14.68600 | 19.14900 |
| O | -39.82300 | 9.47900  | 21.23800 |
| O | -41.01200 | 13.64700 | 21.12200 |
| C | -39.15600 | 6.98000  | 19.91100 |
| H | -39.73300 | 6.07100  | 19.68400 |
| H | -39.11700 | 7.13500  | 20.99600 |
| C | -40.13600 | 9.25800  | 20.07200 |
| C | -41.69600 | 11.14700 | 19.84100 |
| H | -42.76400 | 10.86600 | 19.81000 |
| H | -41.37600 | 11.25800 | 20.88400 |
| C | -41.37400 | 13.59400 | 19.95200 |
| N | -35.53200 | 24.63800 | 19.26200 |
| N | -33.52100 | 23.27900 | 19.36500 |
| N | -32.47400 | 21.29600 | 19.42200 |
| N | -31.90500 | 18.93200 | 19.51900 |
| N | -31.63100 | 16.68800 | 19.59400 |
| O | -33.79500 | 21.92200 | 21.24600 |
| O | -32.28100 | 17.81100 | 21.53900 |
| C | -34.23000 | 24.44100 | 19.86000 |
| H | -33.61500 | 25.33700 | 19.68500 |
| H | -34.38200 | 24.30000 | 20.93600 |
| C | -33.32800 | 22.14100 | 20.13200 |
| C | -31.74000 | 20.25600 | 20.11000 |
| H | -30.66500 | 20.51500 | 20.12000 |
| H | -32.11700 | 20.20600 | 21.13800 |
| C | -31.97400 | 17.81000 | 20.35100 |
| N | -35.42500 | 6.60300  | 17.10600 |
| N | -33.21800 | 7.62500  | 17.08900 |
| N | -32.21300 | 9.62000  | 17.11000 |
| N | -31.74500 | 11.99600 | 17.15200 |
| N | -31.94600 | 14.24600 | 17.21100 |
| O | -33.39700 | 8.98800  | 15.20100 |
| O | -32.88300 | 13.06900 | 15.41700 |
| C | -34.06200 | 6.54400  | 16.62400 |
| H | -33.61500 | 5.58800  | 16.93400 |
| H | -34.09300 | 6.60000  | 15.53000 |

|   |           |          |          |
|---|-----------|----------|----------|
| C | -32.99500 | 8.76600  | 16.34400 |
| C | -31.51700 | 10.72600 | 16.48900 |
| H | -30.43100 | 10.53000 | 16.47900 |
| H | -31.88600 | 10.80700 | 15.46000 |
| C | -32.26500 | 13.09200 | 16.47900 |
| O | -36.73100 | 7.71700  | 21.31200 |
| C | -36.70200 | 7.15400  | 20.22000 |
| O | -36.46700 | 23.74500 | 14.93700 |
| C | -36.49800 | 24.29600 | 16.03600 |
| O | -36.37500 | 7.58200  | 15.20900 |
| C | -36.47000 | 7.06200  | 16.31800 |
| O | -36.78000 | 23.79100 | 21.04200 |
| C | -36.70000 | 24.32400 | 19.93900 |
| C | -35.87700 | 5.97700  | 18.33600 |
| H | -35.50100 | 4.94500  | 18.40000 |
| C | -31.73500 | 8.97500  | 18.33100 |
| H | -30.64900 | 8.80500  | 18.28000 |
| C | -32.57300 | 7.66300  | 18.38600 |
| H | -31.96700 | 6.75700  | 18.54000 |
| C | -31.02800 | 13.92800 | 18.30500 |
| H | -30.04100 | 14.38300 | 18.12300 |
| C | -30.96000 | 12.38100 | 18.30600 |
| H | -29.93400 | 11.99000 | 18.21300 |
| C | -35.77000 | 25.36000 | 18.02300 |
| H | -35.28500 | 26.34800 | 18.05100 |
| C | -31.97200 | 21.92800 | 18.20900 |
| H | -30.87300 | 22.00100 | 18.24100 |
| C | -32.68400 | 23.31200 | 18.17900 |
| H | -31.99100 | 24.16700 | 18.22200 |
| C | -31.14400 | 17.06600 | 18.28100 |
| H | -30.12000 | 16.69300 | 18.12000 |
| C | -31.20600 | 18.61100 | 18.27900 |
| H | -30.21000 | 19.08200 | 18.26700 |
| C | -37.43300 | 6.07300  | 18.24500 |
| H | -37.93400 | 5.09300  | 18.22400 |
| C | -41.27300 | 9.43900  | 18.01000 |
| H | -42.36800 | 9.32400  | 17.94800 |
| C | -40.51500 | 8.08100  | 18.05800 |
| H | -41.17800 | 7.20300  | 18.00800 |
| C | -42.33300 | 14.25100 | 17.90300 |
| H | -43.38400 | 14.57800 | 17.85600 |
| C | -42.19300 | 12.70800 | 17.92800 |
| H | -43.16200 | 12.18600 | 17.88500 |
| C | -37.33000 | 25.43000 | 17.94300 |

|   |           |          |          |
|---|-----------|----------|----------|
| H | -37.72500 | 26.45600 | 17.90100 |
| C | -41.42200 | 22.35100 | 17.82200 |
| H | -42.51000 | 22.51200 | 17.77600 |
| C | -40.59600 | 23.67400 | 17.83000 |
| H | -41.21400 | 24.58300 | 17.76100 |
| C | -42.42200 | 17.48000 | 17.85700 |
| H | -43.45500 | 17.10100 | 17.81300 |
| C | -42.35700 | 19.02800 | 17.83700 |
| H | -43.34900 | 19.50500 | 17.80200 |
| C | -31.10200 | 15.51200 | 20.26200 |
| H | -29.99700 | 15.56700 | 20.27800 |
| H | -31.47800 | 15.51100 | 21.28900 |
| C | -31.71700 | 15.45400 | 16.43600 |
| H | -30.66200 | 15.47600 | 16.09900 |
| H | -32.37200 | 15.42300 | 15.55900 |
| C | -42.03100 | 15.84600 | 15.98300 |
| H | -43.12700 | 15.81600 | 15.83500 |
| H | -41.54200 | 15.84400 | 15.00400 |
| C | -42.18800 | 15.89600 | 19.80100 |
| H | -43.29100 | 15.86300 | 19.87500 |
| H | -41.75700 | 15.92200 | 20.80700 |
| N | -35.64300 | 6.90600  | 34.50900 |
| N | -33.52600 | 8.09000  | 34.62200 |
| N | -32.37800 | 10.01000 | 34.56300 |
| N | -31.61000 | 12.31200 | 34.46100 |
| N | -31.25800 | 14.53900 | 34.35400 |
| O | -33.73400 | 9.57300  | 36.41500 |
| O | -32.37900 | 13.65800 | 36.21000 |
| C | -34.34900 | 7.02200  | 35.14700 |
| H | -33.80700 | 6.07000  | 35.03600 |
| H | -34.51800 | 7.23100  | 36.21000 |
| C | -33.27200 | 9.25600  | 35.31800 |
| C | -31.58800 | 11.05200 | 35.18600 |
| H | -30.54000 | 10.71400 | 35.27700 |
| H | -32.00100 | 11.23000 | 36.18500 |
| C | -31.81000 | 13.51500 | 35.12900 |
| N | -35.48700 | 24.37900 | 31.19300 |
| N | -33.38400 | 23.17300 | 31.35600 |
| N | -32.14500 | 21.31400 | 31.49900 |
| N | -31.35900 | 19.03000 | 31.66800 |
| N | -31.08000 | 16.80100 | 31.80000 |
| O | -33.40300 | 21.67500 | 29.56300 |
| O | -31.95000 | 17.70700 | 29.83200 |
| C | -34.13400 | 24.23400 | 30.71100 |

|   |           |          |          |
|---|-----------|----------|----------|
| H | -33.59900 | 25.18400 | 30.85700 |
| H | -34.18900 | 23.99500 | 29.64300 |
| C | -33.03300 | 22.01300 | 30.68300 |
| C | -31.30000 | 20.28600 | 30.94100 |
| H | -30.25300 | 20.63600 | 30.92000 |
| H | -31.64800 | 20.09100 | 29.92000 |
| C | -31.51400 | 17.83500 | 30.97400 |
| N | -37.72700 | 6.73600  | 31.97500 |
| N | -39.84500 | 7.91000  | 31.78800 |
| N | -41.00100 | 9.83000  | 31.67300 |
| N | -41.75700 | 12.13600 | 31.51300 |
| N | -42.12500 | 14.35900 | 31.38700 |
| O | -39.65100 | 9.21600  | 29.86400 |
| O | -41.24000 | 13.25600 | 29.52400 |
| C | -39.03100 | 6.79500  | 31.35100 |
| H | -39.57100 | 5.85700  | 31.55400 |
| H | -38.87600 | 6.90400  | 30.27100 |
| C | -40.10200 | 9.01000  | 30.98600 |
| C | -41.80000 | 10.79700 | 30.94600 |
| H | -42.85000 | 10.45400 | 30.91700 |
| H | -41.40300 | 10.85600 | 29.92700 |
| C | -41.65700 | 13.25200 | 30.67800 |
| N | -37.76700 | 24.51600 | 33.61700 |
| N | -39.85700 | 23.28100 | 33.57500 |
| N | -41.07300 | 21.40700 | 33.62500 |
| N | -41.80000 | 19.10500 | 33.66200 |
| N | -41.93200 | 16.86000 | 33.71300 |
| O | -39.75600 | 21.93400 | 35.48000 |
| O | -40.89800 | 17.97600 | 35.49300 |
| C | -39.11900 | 24.40700 | 34.11000 |
| H | -39.66500 | 25.33300 | 33.87500 |
| H | -39.06100 | 24.27500 | 35.19700 |
| C | -40.17100 | 22.17800 | 34.34800 |
| C | -41.88200 | 20.41000 | 34.28200 |
| H | -42.93700 | 20.73500 | 34.28600 |
| H | -41.51800 | 20.31800 | 35.31200 |
| C | -41.47200 | 17.98200 | 34.40400 |
| N | -37.71900 | 24.33700 | 31.16500 |
| N | -39.86500 | 23.19700 | 31.11800 |
| N | -41.10000 | 21.32600 | 31.17700 |
| N | -41.89100 | 19.02300 | 31.21600 |
| N | -42.15500 | 16.78400 | 31.27500 |
| O | -39.83900 | 21.77900 | 29.26200 |
| O | -41.46800 | 17.78400 | 29.27600 |



|   |           |          |          |
|---|-----------|----------|----------|
| C | -39.04000 | 24.25500 | 30.57500 |
| H | -39.55500 | 25.21700 | 30.71800 |
| H | -38.91400 | 24.05500 | 29.50400 |
| C | -40.21400 | 22.06700 | 30.39600 |
| C | -41.95000 | 20.32200 | 30.56700 |
| H | -42.99600 | 20.67800 | 30.56900 |
| H | -41.60600 | 20.18700 | 29.53500 |
| C | -41.79300 | 17.85700 | 30.45600 |
| N | -37.87100 | 6.77900  | 34.42700 |
| N | -39.97200 | 7.98500  | 34.24400 |
| N | -41.13900 | 9.88500  | 34.11900 |
| N | -41.82600 | 12.19600 | 33.95600 |
| N | -41.93000 | 14.43900 | 33.82900 |
| O | -39.95700 | 9.43200  | 36.07900 |
| O | -40.99200 | 13.45400 | 35.73400 |
| C | -39.24100 | 6.90000  | 34.86600 |
| H | -39.76400 | 5.95300  | 34.66700 |
| H | -39.22800 | 7.09300  | 35.94500 |
| C | -40.30800 | 9.13300  | 34.93700 |
| C | -41.95800 | 10.94100 | 34.66500 |
| H | -43.01800 | 10.63300 | 34.65000 |
| H | -41.63800 | 11.10300 | 35.70100 |
| C | -41.51800 | 13.37200 | 34.62400 |
| N | -35.53700 | 24.46400 | 33.64700 |
| N | -33.38900 | 23.34000 | 33.80800 |
| N | -32.13000 | 21.49400 | 33.94300 |
| N | -31.33200 | 19.20500 | 34.11200 |
| N | -31.15400 | 16.96400 | 34.24300 |
| O | -33.44700 | 22.09000 | 35.78000 |
| O | -32.04800 | 18.13000 | 36.06100 |
| C | -34.22000 | 24.44300 | 34.24500 |
| H | -33.70600 | 25.38900 | 34.01500 |
| H | -34.34700 | 24.34800 | 35.33000 |
| C | -33.04500 | 22.28500 | 34.63400 |
| C | -31.27500 | 20.55800 | 34.64100 |
| H | -30.23000 | 20.91000 | 34.59300 |
| H | -31.60100 | 20.52700 | 35.68700 |
| C | -31.56300 | 18.10600 | 34.93000 |
| N | -35.49800 | 6.68500  | 32.06700 |
| N | -33.44600 | 7.98300  | 32.16600 |
| N | -32.26000 | 9.88200  | 32.12100 |
| N | -31.47700 | 12.17000 | 32.02500 |
| N | -31.13400 | 14.39100 | 31.91600 |
| O | -33.43800 | 9.25400  | 30.20600 |

|   |           |          |          |
|---|-----------|----------|----------|
| O | -31.99900 | 13.29400 | 30.04200 |
| C | -34.13100 | 6.82500  | 31.62600 |
| H | -33.57100 | 5.91800  | 31.89900 |
| H | -34.15000 | 6.93500  | 30.53500 |
| C | -33.09900 | 9.06200  | 31.37100 |
| C | -31.40100 | 10.83700 | 31.45800 |
| H | -30.35300 | 10.48800 | 31.50400 |
| H | -31.72300 | 10.89700 | 30.41200 |
| C | -31.58500 | 13.28400 | 31.19900 |
| O | -36.88100 | 7.90500  | 36.21900 |
| C | -36.80800 | 7.28100  | 35.16200 |
| O | -36.56200 | 23.35000 | 29.39300 |
| C | -36.58500 | 23.94100 | 30.47000 |
| O | -36.51600 | 7.55600  | 30.15500 |
| C | -36.57400 | 7.06300  | 31.27900 |
| O | -36.69700 | 23.63900 | 35.49700 |
| C | -36.67100 | 24.13500 | 34.37300 |
| C | -35.89600 | 6.09000  | 33.32800 |
| H | -35.44300 | 5.09400  | 33.44700 |
| C | -31.90100 | 9.28100  | 33.39400 |
| H | -30.81300 | 9.12200  | 33.45600 |
| C | -32.71900 | 7.95600  | 33.42400 |
| H | -32.09500 | 7.05100  | 33.48400 |
| C | -30.55500 | 14.01000 | 33.19400 |
| H | -29.48800 | 14.28200 | 33.23200 |
| C | -30.79500 | 12.48100 | 33.26900 |
| H | -29.86400 | 11.89900 | 33.35600 |
| C | -35.84600 | 25.12200 | 32.38600 |
| H | -35.40200 | 26.12900 | 32.36200 |
| C | -31.74900 | 22.08300 | 32.66700 |
| H | -30.66700 | 22.28800 | 32.64800 |
| C | -32.62300 | 23.36900 | 32.57600 |
| H | -32.03600 | 24.29900 | 32.51200 |
| C | -30.45300 | 17.30400 | 33.01000 |
| H | -29.40000 | 16.98400 | 33.06000 |
| C | -30.61300 | 18.84500 | 32.90300 |
| H | -29.65100 | 19.38000 | 32.85500 |
| C | -37.45400 | 6.06300  | 33.23600 |
| H | -37.88100 | 5.04900  | 33.23100 |
| C | -41.48800 | 9.19200  | 32.89100 |
| H | -42.57600 | 9.03200  | 32.83300 |
| C | -40.67400 | 7.86700  | 32.97700 |
| H | -41.30100 | 6.96100  | 32.97300 |
| C | -42.68900 | 13.97800 | 32.66900 |

|   |           |          |          |
|---|-----------|----------|----------|
| H | -43.74100 | 14.29800 | 32.74200 |
| C | -42.52700 | 12.43700 | 32.71200 |
| H | -43.48800 | 11.89800 | 32.70100 |
| C | -37.40600 | 25.12400 | 32.35000 |
| H | -37.84500 | 26.13000 | 32.26700 |
| C | -41.48400 | 22.04300 | 32.38600 |
| H | -42.56900 | 22.23500 | 32.39100 |
| C | -40.62600 | 23.34300 | 32.34400 |
| H | -41.22400 | 24.26800 | 32.31600 |
| C | -42.71000 | 17.24000 | 32.53800 |
| H | -43.75500 | 16.90700 | 32.64500 |
| C | -42.57200 | 18.78400 | 32.47900 |
| H | -43.54200 | 19.30800 | 32.49900 |
| C | -30.80400 | 15.76500 | 34.98800 |
| H | -29.70700 | 15.72000 | 35.11600 |
| H | -31.27900 | 15.83300 | 35.97300 |
| C | -30.64300 | 15.55400 | 31.20700 |
| H | -29.53800 | 15.53100 | 31.18100 |
| H | -31.02900 | 15.51400 | 30.18400 |
| C | -42.60300 | 15.53500 | 30.68400 |
| H | -43.70800 | 15.51800 | 30.66400 |
| H | -42.22200 | 15.49400 | 29.65900 |
| C | -42.29300 | 15.68400 | 34.47700 |
| H | -43.38400 | 15.69100 | 34.66100 |
| H | -41.76400 | 15.73100 | 35.43500 |
